# Supplementary material for: A method for designing a novel class of gold-containing molecules
Source: Royal Society of Chemistry journal article supplement (doi:10.1039/d0cc01227k), 2020-01-01
Supplement: d0cc01227k1.pdf [file d0cc01227k1.pdf]

Cite this: DOI: 10.1039/xxxxxxxxxx

## Electronic Supplementary Information

# A method for designing a novel class of gold-containing molecules

Christian A. Celaya<sup>a,b</sup>, Mesías Orozco-Ic<sup>a</sup>, Maria Dimitrova<sup>a</sup>, Lukas N. Wirz<sup>a</sup>, Dage Sundholm<sup>\*a</sup>

Received Date  
Accepted Date

DOI: 10.1039/xxxxxxxxxx

www.rsc.org/journalname

## Contents

|                                     |          |
|-------------------------------------|----------|
| <b>1 Computational methods</b>      | <b>1</b> |
| <b>2 Molecular coordinates in Å</b> | <b>2</b> |
| 2.1 Molecule in Figure 1(a)         | 2        |
| 2.2 Molecule in Figure 1(b)         | 2        |
| 2.3 Unit cell in Figure 2(b)        | 3        |
| 2.4 Molecule in Figure 3(a)         | 3        |
| 2.5 Molecule in Figure 3(b)         | 3        |
| 2.6 Unit cell in Figure 4(b)        | 4        |
| 2.7 Molecule in Figure 5(a)         | 4        |
| 2.8 Molecule in Figure 5(b)         | 4        |
| 2.9 Molecule in Figure 6(a)         | 5        |
| 2.10 Unit cell in Figure 6(b)       | 5        |
| 2.11 Molecule in Figure 7(a)        | 6        |
| 2.12 Molecule in Figure 7(b)        | 7        |
| 2.13 Molecule in Figure 8           | 9        |
| 2.14 Unit cell in Figure 9          | 10       |
| 2.15 Molecule in Figure 10(a)       | 11       |
| 2.16 Molecule in Figure 10(b)       | 12       |
| 2.17 Molecule in Figure 11          | 13       |

## 1 Computational methods

The molecular structures were optimized at the B3LYP(D3-BJ)/def2-TZVP level of theory using Turbomole.<sup>1–5</sup> The integration grid 6 was used.<sup>6</sup> Excitation energies were calculated at the time-dependent density functional theory level using the B3LYP and M06-2X functionals and the def2-TZVP basis set.<sup>1,5,7–9</sup>

The calculations on infinite one-dimensional (1D) nanotubes with periodic boundary conditions (PBC) were performed at the PBE<sup>10</sup> level with the SIESTA *ab initio* package<sup>11</sup> using the Troullier-Martins pseudopotentials<sup>12</sup> and the corresponding double- $\zeta$  polarization (DZP) basis sets. Dispersion interaction was considered employing the semi-empirical D2 correction.<sup>13</sup> The convergence criteria of the 1D PBC calculations were  $10^{-5}$  eV for the energy,  $10^{-5}$   $e$  for the electron density, and 0.04 eV/Å for the structure optimizations. The real-space mesh cut-off energy is set to 250 Ry and a  $1 \times 1 \times 3$  k point grid were employed.<sup>14</sup> The starting structures of the single-wall nanotubes were generated by using our own code which is available for free.<sup>15</sup>

Calculations on the two-dimensional (2D) structures with PBC were performed with the Quantum ESPRESSO 6.2 code at the PBE level using a plane-wave basis set with a cut-off at 680 eV.<sup>10,16</sup> The USPP ultrasoft pseudopotentials were used for all atoms.<sup>17</sup> The D3-BJ semi-empirical correction was used to account for van-der-Waals interactions.<sup>4</sup> In the structure optimization, we used  $6 \times 6 \times 1$   $k$  points for the primitive cell. A primitive cell consisting of  $12 \times 12 \times 2$   $k$  points were used in the calculation of electronic properties and density of states.<sup>14</sup> The convergence criteria of the 2D PBC calculations were  $10^{-5}$  eV for the energy,  $10^{-5}$  eV and 0.025 eV/Å for the structure optimizations using the Broyden-Fletcher-Goldfarb-Shannon (BFGS) quasi-Newton algorithm.<sup>18</sup>

<sup>a</sup> University of Helsinki, Department of Chemistry, P.O. Box 55 (A.I. Virtanens plats 1), FIN-00014 University of Helsinki, Finland Email: Dage.Sundholm@helsinki.fi

<sup>b</sup> Departamento de Materiales de Baja Dimensionalidad, Instituto de Investigaciones en Materiales, UNAM, Apartado Postal 70-360, Ciudad de México 04510, México.

## References

- 1 A. D. Becke, *J. Chem. Phys.*, 1993, **98**, 5648–5652.
- 2 R. Ahlrichs, M. Bär, M. Häser, H. Horn and C. Kölmel, *Chem. Phys. Letters*, 1989, **162**, 165–169.
- 3 F. Furche, R. Ahlrichs, C. Hättig, W. Klopper, M. Sierka and F. Weigend, *WIREs Comput. Mol. Sci.*, 2014, **4**, 91–100.
- 4 S. Grimme, S. Ehrlich and L. Goerigk, *J. Comp. Chem.*, 2011, **32**, 1456–1465.
- 5 F. Weigend and R. Ahlrichs, *Phys. Chem. Chem. Phys.*, 2005, **7**, 3297–3305.
- 6 O. Treutler and R. Ahlrichs, *J. Chem. Phys.*, 1995, **102**, 346–354.
- 7 M. Casida and M. Huix-Rotllant, *Annu. Rev. Phys. Chem.*, 2012, **63**, 287–323.
- 8 Y. Zhao and D. G. Truhlar, *Theo. Chem. Acc.*, 2008, **120**, 215–241.
- 9 F. Furche and R. Ahlrichs, *J. Chem. Phys.*, 2002, **117**, 7433–7447.
- 10 J. P. Perdew, K. Burke and M. Ernzerhof, *Phys. Rev. Letters*, 1996, **77**, 3865–3868.
- 11 J. M. Soler, E. Artacho, J. D. Gale, A. Garcia, J. Junquera, P. Ordejón and D. Sánchez-Portal, *J. Phys.: Condens. Matter*, 2002, **14**, 2745–2780.
- 12 N. Troullier and J. L. Martins, *Phys. Rev. B*, 1991, **43**, 1993–2006.
- 13 S. Grimme, *J. Comp. Chem.*, 2006, **27**, 1787–1799.
- 14 H. J. Monkhorst and J. D. Pack, *Phys. Rev. B*, 1976, **13**, 5188–5192.
- 15 L. N. Wirz, <https://github.com/lnw/general-molecular-tubes>.
- 16 P. Giannozzi, O. Andreussi, T. Brumme, O. Bunau, M. B. Nardelli, M. Calandra, R. Car, C. Cavazzoni, D. Ceresoli, M. Cococcioni, N. Colonna, I. Carnimeo, A. D. Corso, S. de Gironcoli, P. Delugas, R. A. D. Jr, A. Ferretti, A. Floris, G. Fratesi, G. Fugallo, R. Gebauer, U. Gerstmann, F. Giustino, T. Gorni, J. Jia, M. Kawamura, H.-Y. Ko, A. Kokalj, E. Küçükbenli, M. Lazzeri, M. Marsili, N. Marzari, F. Mauri, N. L. Nguyen, H.-V. Nguyen, A. O. de-la Roza, L. Paulatto, S. Poncé, D. Rocca, R. Sabatini, B. Santra, M. Schlipf, A. P. Seitsonen, A. Smogunov, I. Timrov, T. Thonhauser, P. Umari, N. Vast, X. Wu and S. Baroni, *J. Phys.: Cond. Matter*, 2017, **29**, 465901.
- 17 A. M. Rappe, K. M. Rabe, E. Kaxiras and J. D. Joannopoulos, *Phys. Rev. B*, 1990, **41**, 1227–1230.
- 18 F. E. Curtis and X. Que, *Math. Program. Comput.*, 2015, **7**, 399–428.

## 2 Molecular coordinates in Å

### 2.1 Molecule in Figure 1(a)

27

|    |             |             |            |
|----|-------------|-------------|------------|
| C  | -2.61555700 | -4.36408400 | 0.00000000 |
| C  | 5.08718700  | -0.08309700 | 0.00000000 |
| H  | -3.48924800 | -5.00845900 | 0.00000000 |
| H  | 6.08207600  | -0.51754800 | 0.00000000 |
| C  | -2.47162900 | 4.44718100  | 0.00000000 |
| H  | -2.59282800 | 5.52600700  | 0.00000000 |
| C  | -1.75491700 | -2.25043200 | 0.00000000 |
| C  | 2.82639000  | -0.39458700 | 0.00000000 |
| C  | -1.07147200 | 2.64501900  | 0.00000000 |
| C  | -0.39918300 | -4.13747400 | 0.00000000 |
| H  | 0.60269700  | -4.55136600 | 0.00000000 |
| C  | 3.78275000  | 1.72303400  | 0.00000000 |
| H  | 3.64025000  | 2.79763400  | 0.00000000 |
| C  | -3.38356600 | 2.41444000  | 0.00000000 |
| H  | -4.24294700 | 1.75373200  | 0.00000000 |
| N  | 2.67929100  | 0.96592500  | 0.00000000 |
| N  | 5.01440600  | 1.25113200  | 0.00000000 |
| N  | 4.06217300  | -0.92094500 | 0.00000000 |
| N  | -2.17616100 | 1.83737200  | 0.00000000 |
| N  | -1.23352400 | 3.97841700  | 0.00000000 |
| N  | -3.59071500 | 3.71703700  | 0.00000000 |
| N  | -0.50313000 | -2.80329700 | 0.00000000 |
| N  | -2.82864800 | -3.05747200 | 0.00000000 |
| N  | -1.42369000 | -4.96816900 | 0.00000000 |
| Au | 0.75355000  | 1.81979000  | 0.00000000 |

|    |             |             |            |
|----|-------------|-------------|------------|
| Au | -1.95276000 | -0.25730100 | 0.00000000 |
| Au | 1.19920900  | -1.56248900 | 0.00000000 |

### 2.2 Molecule in Figure 1(b)

63

|    |             |             |            |
|----|-------------|-------------|------------|
| C  | 0.68327400  | 1.18346600  | 0.00000000 |
| C  | -6.15669100 | 1.17810600  | 0.00000000 |
| C  | -2.71900100 | -4.70944700 | 0.00000000 |
| C  | -2.71900100 | 4.70944700  | 0.00000000 |
| C  | 0.68327400  | -1.18346600 | 0.00000000 |
| C  | 2.05807600  | -5.92090400 | 0.00000000 |
| C  | -1.36654900 | 0.00000000  | 0.00000000 |
| C  | 5.43800100  | 0.00000000  | 0.00000000 |
| C  | 2.05807600  | 5.92090400  | 0.00000000 |
| C  | 4.04521300  | 7.00651500  | 0.00000000 |
| H  | 4.58854400  | 7.94759100  | 0.00000000 |
| C  | 7.47820000  | 1.11492000  | 0.00000000 |
| H  | 8.00306800  | 2.06264000  | 0.00000000 |
| C  | 7.47820000  | -1.11492000 | 0.00000000 |
| H  | 8.00306800  | -2.06264000 | 0.00000000 |
| C  | 4.04521300  | -7.00651500 | 0.00000000 |
| H  | 4.58854400  | -7.94759100 | 0.00000000 |
| C  | -2.77355100 | -7.03377100 | 0.00000000 |
| H  | -2.21523600 | -7.96218000 | 0.00000000 |
| C  | -4.70464900 | -5.91885100 | 0.00000000 |
| H  | -5.78783200 | -5.89954000 | 0.00000000 |
| C  | -8.09042700 | 0.00000000  | 0.00000000 |
| H  | -9.17708700 | 0.00000000  | 0.00000000 |
| C  | -4.70464900 | 5.91885100  | 0.00000000 |
| H  | -5.78783200 | 5.89954000  | 0.00000000 |
| C  | -2.77355100 | 7.03377100  | 0.00000000 |
| H  | -2.21523600 | 7.96218000  | 0.00000000 |
| N  | -0.67122300 | 1.16259300  | 0.00000000 |
| N  | 1.34244700  | 0.00000000  | 0.00000000 |
| N  | -0.67122300 | -1.16259300 | 0.00000000 |
| Au | -1.71977100 | 2.97873000  | 0.00000000 |
| Au | 1.68744500  | 2.92274000  | 0.00000000 |
| Au | -3.37488900 | 0.00000000  | 0.00000000 |
| N  | -5.47393100 | 0.00000000  | 0.00000000 |
| N  | -7.49277500 | -1.18594200 | 0.00000000 |
| N  | -7.49277500 | 1.18594200  | 0.00000000 |
| N  | -4.09577200 | 7.09408500  | 0.00000000 |
| C  | 4.09861500  | -4.74279800 | 0.00000000 |
| C  | 4.09861500  | 4.74279800  | 0.00000000 |
| Au | 0.05571800  | -5.89955800 | 0.00000000 |
| Au | 0.05571800  | 5.89955800  | 0.00000000 |
| Au | 5.08130800  | -2.99803200 | 0.00000000 |
| C  | -6.15669100 | -1.17810600 | 0.00000000 |
| Au | -5.13702600 | -2.90152600 | 0.00000000 |
| Au | -5.13702600 | 2.90152600  | 0.00000000 |
| N  | -4.07847400 | 4.73991700  | 0.00000000 |
| N  | -4.07847400 | -4.73991700 | 0.00000000 |
| N  | -2.06565200 | -5.90202100 | 0.00000000 |
| N  | -4.09577200 | -7.09408500 | 0.00000000 |
| N  | 2.73696500  | -4.74056300 | 0.00000000 |
| N  | 4.77344300  | -5.89596300 | 0.00000000 |
| N  | 2.71933200  | -7.08190400 | 0.00000000 |
| N  | 6.14412600  | -1.16210400 | 0.00000000 |
| N  | 8.19154300  | 0.00000000  | 0.00000000 |
| N  | 2.73696500  | 4.74056300  | 0.00000000 |
| N  | -2.06565200 | 5.90202100  | 0.00000000 |
| N  | 6.14412600  | 1.16210400  | 0.00000000 |
| N  | 4.77344300  | 5.89596300  | 0.00000000 |
| N  | 2.71933200  | 7.08190400  | 0.00000000 |
| Au | -1.71977100 | -2.97873000 | 0.00000000 |
| Au | 1.68744500  | -2.92274000 | 0.00000000 |
| Au | 3.43954100  | 0.00000000  | 0.00000000 |

Au 5.08130800 2.99803200 0.00000000

### 2.3 Unit cell in Figure 2(b)

9  
cell parameters a=b=6.75 \AA, c= 20.0 \AA  
C 2.437723469 0.676291798 2.000024761  
C 3.761748928 5.338629238 2.000026795  
N 1.742568268 1.841875116 2.000044039  
C 7.137399391 1.860560851 2.000023699  
Au 6.152447481 3.565208292 1.999923222  
N 6.475568317 0.675761325 2.000040163  
N 5.118748213 5.357768749 2.000045212  
Au 4.406411157 0.676783463 1.999927049  
Au 2.777716040 3.633520945 1.999945058

### 2.4 Molecule in Figure 3(a)

66  
Energy =  
C -1.9389457 3.3583525 0.0000000  
C -1.9389457 -3.3583525 0.0000000  
C 3.8778914 0.0000000 0.0000000  
C -7.7136406 0.0000000 0.0000000  
C 3.8568203 6.6802087 0.0000000  
C 3.8568203 -6.6802087 0.0000000  
C -1.8511369 10.1584711 0.0000000  
C 9.7230625 3.4761040 0.0000000  
C 9.7230625 -3.4761040 0.0000000  
H 8.0512160 -7.6992870 0.0000000  
C -1.8511369 -10.1584711 0.0000000  
C -7.8719256 -6.6823671 0.0000000  
C -7.8719256 6.6823671 0.0000000  
H 10.8163171 -3.5027050 0.0000000  
H 10.8163171 3.5027050 0.0000000  
H 8.0512160 7.6992870 0.0000000  
H 2.6421701 10.8222011 0.0000000  
H -2.3747270 11.1185579 0.0000000  
H -8.4415900 7.6158529 0.0000000  
H -10.6933861 3.1229141 0.0000000  
H -10.6933861 -3.1229141 0.0000000  
H -8.4415900 -7.6158529 0.0000000  
H -2.3747270 -11.1185579 0.0000000  
H 2.6421701 -10.8222011 0.0000000  
Au 2.4897560 1.3596719 0.0000000  
Au -2.4223884 -1.4763560 0.0000000  
Au -0.0673676 -2.8360278 0.0000000  
Au 2.4897560 -1.3596719 0.0000000  
Au -0.0673676 2.8360278 0.0000000  
Au -2.4223884 1.4763560 0.0000000  
Au -2.9040480 5.0299587 0.0000000  
Au -2.8958286 8.4630429 0.0000000  
Au 0.0779237 10.0730779 0.0000000  
Au 2.6860923 8.1505421 0.0000000  
Au 2.8520408 4.9398795 0.0000000  
Au 5.7155303 6.4014952 0.0000000  
Au 8.6845795 5.1040228 0.0000000  
Au 8.7771244 1.7236603 0.0000000  
Au 5.8080960 0.0000000 0.0000000  
Au 8.7771244 -1.7236603 0.0000000  
Au 8.6845795 -5.1040228 0.0000000  
Au 5.7155303 -6.4014952 0.0000000  
Au 2.8520408 -4.9398795 0.0000000  
Au 2.6860923 -8.1505421 0.0000000  
Au 0.0779237 -10.0730779 0.0000000  
Au -2.8958286 -8.4630429 0.0000000  
Au -2.9040480 -5.0299587 0.0000000  
Au -5.8812958 -6.7393826 0.0000000  
Au -8.7625032 -4.9690551 0.0000000

Au -8.4016227 -1.7490468 0.0000000  
Au -5.7040815 0.0000000 0.0000000  
Au -8.4016227 1.7490468 0.0000000  
Au -8.7625032 4.9690551 0.0000000  
Au -5.8812958 6.7393826 0.0000000  
N -3.7025158 0.0000000 0.0000000  
N 1.8512579 3.2064727 0.0000000  
N 1.8512579 -3.2064727 0.0000000  
N -3.8927635 -6.7424642 0.0000000  
N 7.7855270 0.0000000 0.0000000  
N 7.6309295 6.7788733 0.0000000  
N 7.6309295 -6.7788733 0.0000000  
N 2.0552118 -9.9980154 0.0000000  
N -9.6861412 -3.2191421 0.0000000  
N -9.6861412 3.2191421 0.0000000  
N -3.8927635 6.7424642 0.0000000  
N 2.0552118 9.9980154 0.0000000

### 2.5 Molecule in Figure 3(b)

54  
Energy =  
C -2.0676535 3.5812809 0.0000000  
C -2.0676535 -3.5812809 0.0000000  
C 4.1353070 0.0000000 0.0000000  
C 2.5598769 -4.4338369 0.0000000  
C 2.5598769 4.4338369 0.0000000  
C -5.1197539 0.0000000 0.0000000  
C -6.7754602 4.6221594 0.0000000  
H -7.4322313 5.4972516 0.0000000  
H -8.3669558 3.4843592 0.0000000  
H 1.1659343 8.9881759 0.0000000  
C -0.6151774 8.1788004 0.0000000  
H -1.0446439 9.1851269 0.0000000  
C 7.2010215 5.5038167 0.0000000  
C 7.3906376 3.5566409 0.0000000  
H 8.4768751 3.6878753 0.0000000  
H 7.2010215 -5.5038167 0.0000000  
C 7.3906376 -3.5566409 0.0000000  
H 8.4768751 -3.6878753 0.0000000  
C -0.6151774 -8.1788004 0.0000000  
H -1.0446439 -9.1851269 0.0000000  
H 1.1659343 -8.9881759 0.0000000  
H -8.3669558 -3.4843592 0.0000000  
C -6.7754602 -4.6221594 0.0000000  
H -7.4322313 -5.4972516 0.0000000  
N 0.6679295 -8.1008951 0.0000000  
N -2.6705256 -4.6254860 0.0000000  
N -7.3495457 -3.4720037 0.0000000  
N -3.8546908 0.0000000 0.0000000  
N -2.6705256 4.6254860 0.0000000  
N -7.3495457 3.4720037 0.0000000  
N 0.6679295 8.1008951 0.0000000  
N 1.9273454 3.3382601 0.0000000  
N 5.3410512 0.0000000 0.0000000  
N 6.6816163 4.6288915 0.0000000  
N 6.6816163 -4.6288915 0.0000000  
N 1.9273454 -3.3382601 0.0000000  
Au 4.5746869 4.5682162 0.0000000  
Au 1.6688478 6.2459031 0.0000000  
Au -0.1052225 3.0688419 0.0000000  
Au -1.7211560 6.5029752 0.0000000  
Au 6.4923197 -1.7609228 0.0000000  
Au 6.4923197 1.7609228 0.0000000  
Au 2.7103063 -1.4432956 0.0000000  
Au 4.5746869 -4.5682162 0.0000000  
Au 2.7103063 1.4432956 0.0000000  
Au 1.6688478 -6.2459031 0.0000000  
Au -0.1052225 -3.0688419 0.0000000

|    |            |            |           |
|----|------------|------------|-----------|
| Au | -1.7211560 | -6.5029752 | 0.0000000 |
| Au | -4.7711637 | -4.7420524 | 0.0000000 |
| Au | -2.6050838 | -1.6255463 | 0.0000000 |
| Au | -6.2435347 | -1.6776869 | 0.0000000 |
| Au | -4.7711637 | 4.7420524  | 0.0000000 |
| Au | -6.2435347 | 1.6776869  | 0.0000000 |
| Au | -2.6050838 | 1.6255463  | 0.0000000 |

## 2.6 Unit cell in Figure 4(b)

24  
cell parameters a=16.47 \AA, b =9.5 \AA, c= 20.0 \AA

|    |             |             |             |
|----|-------------|-------------|-------------|
| C  | 4.269560449 | 3.39785566  | 14.99997376 |
| C  | 7.881636671 | 9.663058801 | 14.9999886  |
| C  | 11.50764107 | 3.393180791 | 15.00000146 |
| C  | 3.277608753 | 8.134620242 | 15.00002531 |
| C  | 12.49227735 | 8.13992732  | 15.00000766 |
| C  | 16.12233198 | 4.919128976 | 15.00004748 |
| N  | 4.363464354 | 7.508718973 | 15.00003583 |
| N  | 3.187824911 | 2.773363163 | 14.99996511 |
| N  | 7.881420744 | 1.414937089 | 14.9999625  |
| N  | 12.59334286 | 2.771750797 | 15.00001447 |
| N  | 16.1219111  | 6.170739898 | 15.00006643 |
| N  | 11.40827132 | 7.514703006 | 15.0000021  |
| Au | 14.34890926 | 7.317673249 | 15.00003795 |
| Au | 9.524379541 | 8.468144517 | 14.99999214 |
| Au | 6.243257751 | 8.465940396 | 15.00001146 |
| Au | 4.519459013 | 5.411255441 | 15.00000167 |
| Au | 1.423747528 | 7.305387517 | 14.99998029 |
| Au | 1.295841604 | 3.723857847 | 14.99993782 |
| Au | 11.27628144 | 5.409773012 | 15.00000606 |
| Au | 14.47907733 | 3.726744273 | 15.00002741 |
| Au | 12.69854094 | 0.659872981 | 14.99997896 |
| Au | 9.652956971 | 2.565560723 | 14.99998097 |
| Au | 6.133277434 | 2.592628002 | 14.99998024 |
| Au | 3.090367878 | 0.658226367 | 14.9999743  |

## 2.7 Molecule in Figure 5(a)

20

|    |             |             |             |
|----|-------------|-------------|-------------|
| Au | 1.72649900  | 1.78577100  | -0.00703300 |
| Au | 1.70916200  | -1.85110200 | 0.00454400  |
| Au | -1.74012100 | 1.78185900  | -0.00631800 |
| Au | -1.69357500 | -1.85466700 | 0.00527700  |
| C  | -3.38599800 | 0.63926800  | -0.00112400 |
| N  | -3.39221400 | -0.65226900 | 0.00000600  |
| H  | -4.38212600 | 1.09847800  | 0.00180700  |
| H  | -4.31412800 | -1.08146900 | 0.00299200  |
| C  | 3.37974100  | 0.65442700  | -0.00993500 |
| C  | 0.00913900  | -2.90063500 | 0.01344000  |
| N  | -0.00833400 | 2.92619100  | -0.00946500 |
| N  | 3.39880800  | -0.63694300 | -0.00569600 |
| H  | 4.32478900  | -1.05723700 | -0.00955900 |
| H  | 4.37103000  | 1.12356500  | -0.01774200 |
| C  | -0.00874700 | 4.19222900  | -0.01500700 |
| N  | 0.00824300  | -4.21253200 | 0.02599200  |
| H  | -0.85025300 | -4.74705800 | 0.03173100  |
| H  | 0.86565700  | -4.74876000 | 0.03131000  |
| H  | -0.93612400 | 4.77042400  | -0.02118200 |
| H  | 0.91855300  | 4.77046000  | -0.01403700 |

Bent version of 5(a)

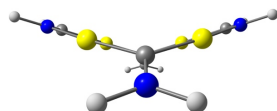

Fig. S1 The bent molecular structure of 5(a), which is 0.5 kJ/mol higher in energy than the planar 5(a) structure in the main article.

20

|    |            |            |            |
|----|------------|------------|------------|
| H  | -1.0505337 | -1.0710050 | -4.2426966 |
| H  | 1.1297425  | -0.8572257 | -4.2066744 |
| C  | -0.6030182 | -0.7246237 | -3.3035243 |
| N  | 0.6835795  | -0.6133431 | -3.3261063 |
| Au | -1.7341610 | -0.2965046 | -1.7053524 |
| Au | 1.8101481  | -0.0022735 | -1.6839711 |
| C  | 2.7497276  | 0.5188619  | 0.0000000  |
| N  | -2.8268719 | 0.1482013  | 0.0000000  |
| N  | 3.8931157  | 1.1600364  | 0.0000000  |
| C  | -3.9832507 | 0.6615824  | 0.0000000  |
| Au | -1.7341610 | -0.2965046 | 1.7053524  |
| Au | 1.8101481  | -0.0022735 | 1.6839711  |
| C  | -0.6030182 | -0.7246237 | 3.3035243  |
| N  | 0.6835795  | -0.6133431 | 3.3261063  |
| H  | -1.0505337 | -1.0710050 | 4.2426966  |
| H  | 1.1297425  | -0.8572257 | 4.2066744  |
| H  | 4.3592167  | 1.4239441  | -0.8579512 |
| H  | 4.3592167  | 1.4239441  | 0.8579512  |
| H  | -4.5113340 | 0.8966906  | 0.9274117  |
| H  | -4.5113340 | 0.8966906  | -0.9274117 |

## 2.8 Molecule in Figure 5(b)

28

|    |            |            |            |
|----|------------|------------|------------|
| C  | 5.8058894  | 0.0000000  | -0.7354113 |
| N  | 5.8945714  | 0.0000000  | 0.6002915  |
| N  | 4.6914573  | -0.0000000 | -1.4451596 |
| C  | 4.7268070  | 0.0000000  | 1.2108587  |
| C  | 3.5178561  | -0.0000000 | -0.7806435 |
| N  | 3.5422876  | 0.0000000  | 0.5897635  |
| Au | 1.7724203  | 0.0000000  | -1.7726536 |
| Au | 1.7290968  | 0.0000000  | 1.6621529  |
| C  | 0.0000000  | 0.0000000  | 2.6607620  |
| N  | 0.0000000  | 0.0000000  | -2.8431585 |
| N  | 0.0000000  | 0.0000000  | 3.9724674  |
| C  | 0.0000000  | 0.0000000  | -4.1111781 |
| Au | -1.7724203 | 0.0000000  | -1.7726536 |
| Au | -1.7290968 | 0.0000000  | 1.6621529  |
| C  | -3.5178561 | 0.0000000  | -0.7806435 |
| N  | -3.5422876 | -0.0000000 | 0.5897635  |
| N  | -4.6914573 | 0.0000000  | -1.4451596 |
| C  | -5.8058894 | 0.0000000  | -0.7354113 |
| C  | -4.7268070 | 0.0000000  | 1.2108587  |
| N  | -5.8945714 | 0.0000000  | 0.6002915  |
| H  | 0.8581620  | 0.0000000  | 4.5075704  |
| H  | -0.8581620 | 0.0000000  | 4.5075704  |
| H  | -0.9275969 | 0.0000000  | -4.6876737 |
| H  | 0.9275969  | 0.0000000  | -4.6876737 |
| H  | 6.7433985  | 0.0000000  | -1.2837141 |
| H  | 4.7116118  | -0.0000000 | 2.2951723  |
| H  | -4.7116118 | 0.0000000  | 2.2951723  |
| H  | -6.7433985 | 0.0000000  | -1.2837141 |

Bent version of 5(b)

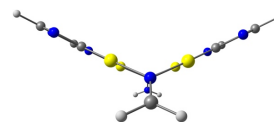

Fig. S2 The bent molecular structure of 5(a), which is 3 kJ/mol lower in energy than the planar 5(b) structure in the main article.

28

|    |            |            |            |
|----|------------|------------|------------|
| C  | 0.3581612  | -1.5581299 | 5.3699089  |
| N  | -0.9380203 | -1.2402132 | 5.4653119  |
| N  | 1.1640477  | -1.2699703 | 4.3617158  |
| C  | -1.4037456 | -0.5772634 | 4.4246205  |
| C  | 0.6460483  | -0.5977818 | 3.3165688  |
| N  | -0.6785448 | -0.2420744 | 3.3544004  |
| Au | 1.7332808  | -0.0976265 | 1.7020856  |
| Au | -1.4448019 | 0.7830511  | 1.6775587  |
| C  | -2.0869762 | 1.6489423  | 0.0000000  |
| N  | 2.7974737  | 0.3984018  | 0.0000000  |
| N  | -2.8422571 | 2.7179335  | 0.0000000  |
| C  | 3.9438877  | 0.9344659  | 0.0000000  |
| Au | 1.7332808  | -0.0976265 | -1.7020856 |
| Au | -1.4448019 | 0.7830511  | -1.6775587 |
| C  | 0.6460483  | -0.5977818 | -3.3165688 |
| N  | -0.6785448 | -0.2420744 | -3.3544004 |
| N  | 1.1640477  | -1.2699703 | -4.3617158 |
| C  | 0.3581612  | -1.5581299 | -5.3699089 |
| C  | -1.4037456 | -0.5772634 | -4.4246205 |
| N  | -0.9380203 | -1.2402132 | -5.4653119 |
| H  | -3.1481211 | 3.1573618  | 0.8582708  |
| H  | -3.1481211 | 3.1573618  | -0.8582708 |
| H  | 4.4665074  | 1.1780682  | -0.9276918 |
| H  | 4.4665074  | 1.1780682  | 0.9276918  |
| H  | 0.7856699  | -2.1058785 | 6.2044480  |
| H  | -2.4465456 | -0.2794148 | 4.4256525  |
| H  | -2.4465456 | -0.2794148 | -4.4256525 |
| H  | 0.7856699  | -2.1058785 | -6.2044480 |

## 2.9 Molecule in Figure 6(a)

84

|    |             |              |            |
|----|-------------|--------------|------------|
| C  | 8.86554300  | 5.86202800   | 0.00000000 |
| C  | 8.86554300  | -5.86202800  | 0.00000000 |
| C  | 4.05837400  | -7.02931000  | 0.00000000 |
| C  | 2.05095900  | -5.88015100  | 0.00000000 |
| C  | 0.64389300  | -10.60880000 | 0.00000000 |
| C  | 4.06688100  | -4.71625800  | 0.00000000 |
| H  | 4.59961000  | -7.96675800  | 0.00000000 |
| C  | 4.05837400  | 7.02931000   | 0.00000000 |
| C  | 2.05095900  | 5.88015100   | 0.00000000 |
| C  | -9.50943700 | -4.74677200  | 0.00000000 |
| C  | 0.64389300  | 10.60880000  | 0.00000000 |
| C  | 4.06688100  | 4.71625800   | 0.00000000 |
| C  | -8.11674900 | 0.00000000   | 0.00000000 |
| C  | -6.11783900 | 1.16389300   | 0.00000000 |
| C  | -6.11783900 | -1.16389300  | 0.00000000 |
| C  | -9.50943700 | 4.74677200   | 0.00000000 |
| H  | -9.19922000 | 0.00000000   | 0.00000000 |
| N  | -5.46241200 | 0.00000000   | 0.00000000 |
| N  | 2.73120600  | 4.73058800   | 0.00000000 |
| N  | 2.73120600  | -4.73058800  | 0.00000000 |
| N  | -7.49407600 | 1.16869000   | 0.00000000 |
| N  | -7.49407600 | -1.16869000  | 0.00000000 |
| N  | 2.73492300  | 7.07440600   | 0.00000000 |
| N  | 4.75915300  | 5.90571600   | 0.00000000 |
| N  | 4.75915300  | -5.90571600  | 0.00000000 |
| N  | 2.73492300  | -7.07440600  | 0.00000000 |
| Au | 5.09376600  | 2.99435900   | 0.00000000 |
| Au | 6.86877400  | 5.92579900   | 0.00000000 |
| Au | 8.53258800  | 2.89989400   | 0.00000000 |
| Au | 5.09376600  | -2.99435900  | 0.00000000 |
| Au | 8.53258800  | -2.89989400  | 0.00000000 |
| Au | 6.86877400  | -5.92579900  | 0.00000000 |
| Au | 0.04630800  | -5.90851000  | 0.00000000 |
| Au | 1.69750600  | -8.91143200  | 0.00000000 |
| Au | -1.75491200 | -8.83938500  | 0.00000000 |

|    |              |              |            |
|----|--------------|--------------|------------|
| Au | -5.14007400  | -2.91415200  | 0.00000000 |
| Au | -6.77767600  | -5.93949100  | 0.00000000 |
| Au | -8.56628000  | -2.98563300  | 0.00000000 |
| Au | -5.14007400  | 2.91415200   | 0.00000000 |
| Au | -6.77767600  | 5.93949100   | 0.00000000 |
| Au | -8.56628000  | 2.98563300   | 0.00000000 |
| Au | 0.04630800   | 5.90851000   | 0.00000000 |
| Au | 1.69750600   | 8.91143200   | 0.00000000 |
| Au | -1.75491200  | 8.83938500   | 0.00000000 |
| C  | -2.76905900  | -4.79615200  | 0.00000000 |
| H  | -2.22768200  | -3.85845800  | 0.00000000 |
| C  | -2.76905900  | 4.79615200   | 0.00000000 |
| H  | -2.22768200  | 3.85845800   | 0.00000000 |
| C  | 5.53811900   | 0.00000000   | 0.00000000 |
| H  | 4.45536300   | 0.00000000   | 0.00000000 |
| C  | 7.53943400   | -1.16361400  | 0.00000000 |
| C  | 7.53943400   | 1.16361400   | 0.00000000 |
| C  | -2.76199800  | 7.11114900   | 0.00000000 |
| C  | -4.77743600  | 5.94753400   | 0.00000000 |
| C  | -4.77743600  | -5.94753400  | 0.00000000 |
| C  | -2.76199800  | -7.11114900  | 0.00000000 |
| N  | -4.09435300  | -4.75078600  | 0.00000000 |
| N  | -2.06712500  | -5.92120700  | 0.00000000 |
| N  | -4.09631700  | -7.09502900  | 0.00000000 |
| N  | -0.64391800  | -10.60089200 | 0.00000000 |
| N  | -4.09435300  | 4.75078600   | 0.00000000 |
| N  | -4.09631700  | 7.09502900   | 0.00000000 |
| N  | -2.06712500  | 5.92120700   | 0.00000000 |
| N  | -0.64391800  | 10.60089200  | 0.00000000 |
| N  | 6.16147800   | 1.17042100   | 0.00000000 |
| N  | 6.16147800   | -1.17042100  | 0.00000000 |
| N  | 8.19263400   | 0.00000000   | 0.00000000 |
| N  | 9.50260000   | 4.74279700   | 0.00000000 |
| N  | 9.50260000   | -4.74279700  | 0.00000000 |
| N  | -8.85868300  | -5.85809500  | 0.00000000 |
| H  | 4.59961000   | 7.96675800   | 0.00000000 |
| N  | -8.85868300  | 5.85809500   | 0.00000000 |
| H  | 1.11806700   | 11.59530400  | 0.00000000 |
| H  | -1.08967200  | 11.51510500  | 0.00000000 |
| H  | -9.42753700  | 6.70123600   | 0.00000000 |
| H  | -10.60086100 | 4.82937800   | 0.00000000 |
| H  | -10.60086100 | -4.82937800  | 0.00000000 |
| H  | -9.42753700  | -6.70123600  | 0.00000000 |
| H  | 9.48279500   | 6.76592600   | 0.00000000 |
| H  | 10.51720900  | 4.81386900   | 0.00000000 |
| H  | 10.51720900  | -4.81386900  | 0.00000000 |
| H  | 9.48279500   | -6.76592600  | 0.00000000 |
| H  | 1.11806700   | -11.59530400 | 0.00000000 |
| H  | -1.08967200  | -11.51510500 | 0.00000000 |

## 2.10 Unit cell in Figure 6(b)

81

cell parameters a=21.35 \AA, b =24.35 \AA, c= 20.0 \AA

|   |             |             |             |
|---|-------------|-------------|-------------|
| C | 19.96300890 | 18.03830572 | 13.85659327 |
| C | 19.96713818 | 6.50025180  | 13.85627287 |
| C | 14.89156279 | 5.08362952  | 13.85726054 |
| C | 12.82292107 | 6.16635861  | 13.85646315 |
| C | 11.38194126 | 1.27936677  | 13.85960273 |
| C | 14.85010991 | 7.40697050  | 13.85617625 |
| H | 15.46016649 | 4.15230926  | 13.85630975 |
| C | 14.88883689 | 19.44768613 | 13.85631210 |
| C | 12.82075971 | 18.36430015 | 13.85805241 |
| C | 0.70154637  | 7.70495479  | 13.85838500 |
| C | 11.38282547 | 23.25568292 | 13.85975078 |
| C | 14.84798258 | 17.12413485 | 13.85807372 |
| C | 2.44056308  | 12.26976525 | 13.85416306 |
| C | 4.45406363  | 13.45758870 | 13.85426209 |
| C | 4.45614297  | 11.08537616 | 13.85487919 |

|    |             |             |             |
|----|-------------|-------------|-------------|
| C  | 0.69909536  | 16.83456044 | 13.85649351 |
| H  | 1.34824852  | 12.26904630 | 13.85211357 |
| N  | 5.09854969  | 12.27184792 | 13.85372811 |
| N  | 13.49663690 | 17.19620811 | 13.85793261 |
| N  | 13.49879754 | 7.33466405  | 13.85533562 |
| N  | 3.05498193  | 13.45772241 | 13.85343067 |
| N  | 3.05681699  | 11.08270492 | 13.85503262 |
| N  | 13.54017559 | 19.56034522 | 13.85714679 |
| N  | 15.59854496 | 18.30004954 | 13.85644463 |
| N  | 15.60105461 | 6.23134908  | 13.85647423 |
| N  | 13.54276151 | 4.97071256  | 13.85706689 |
| Au | 15.85839225 | 15.36754035 | 13.85774697 |
| Au | 17.90442287 | 18.09213711 | 13.85623590 |
| Au | 19.44672990 | 15.11043841 | 13.85909170 |
| Au | 15.86139921 | 9.16443411  | 13.85623160 |
| Au | 19.45064022 | 9.42982889  | 13.85978719 |
| Au | 17.90852216 | 6.44320248  | 13.85592649 |
| Au | 10.77803322 | 6.10651288  | 13.85708777 |
| Au | 12.39979329 | 3.04897788  | 13.85816890 |
| Au | 8.83958931  | 3.21161593  | 13.85960547 |
| Au | 5.42148663  | 9.30581123  | 13.85395818 |
| Au | 3.69703436  | 6.38376996  | 13.85902353 |
| Au | 1.83155443  | 9.35579817  | 13.85718833 |
| Au | 5.41912575  | 15.23621845 | 13.85351033 |
| Au | 3.69598541  | 18.15641656 | 13.85463984 |
| Au | 1.82960864  | 15.18418142 | 13.85454216 |
| Au | 10.77625315 | 18.42631167 | 13.85641045 |
| Au | 12.39859884 | 21.48435726 | 13.85856805 |
| Au | 8.84010849  | 21.32510722 | 13.85733752 |
| C  | 7.82348583  | 7.28988536  | 13.85375812 |
| H  | 8.38888102  | 8.22326774  | 13.84885931 |
| C  | 7.82240907  | 17.24729659 | 13.85425303 |
| H  | 8.38720252  | 16.31361626 | 13.85135403 |
| C  | 16.32770094 | 12.26683499 | 13.85722689 |
| H  | 15.23656503 | 12.26573253 | 13.85443242 |
| C  | 18.33524715 | 11.08837519 | 13.86095854 |
| C  | 18.33242572 | 13.45091028 | 13.86073218 |
| C  | 7.78645281  | 19.57520839 | 13.85768521 |
| C  | 5.75125948  | 18.33470415 | 13.85610225 |
| C  | 5.75167120  | 6.20437765  | 13.86028942 |
| C  | 7.78620095  | 4.96198772  | 13.86114157 |
| N  | 6.47916106  | 7.39712949  | 13.85527289 |
| N  | 8.53188328  | 6.14497700  | 13.85652655 |
| N  | 6.43072149  | 5.03654607  | 13.86218252 |
| N  | 9.98294978  | 1.29396675  | 13.85778814 |
| N  | 6.47795249  | 17.14151162 | 13.85417607 |
| N  | 6.43089398  | 19.50198103 | 13.85711153 |
| N  | 8.53124164  | 18.39172106 | 13.85580377 |
| N  | 9.98378843  | 23.24185268 | 13.85734023 |
| N  | 16.93793618 | 13.46630021 | 13.85812006 |
| N  | 16.94060915 | 11.06911943 | 13.85806295 |
| N  | 18.97727097 | 12.27044978 | 13.86182705 |
| N  | 20.67441698 | 16.84763850 | 13.85745417 |
| N  | 20.67700992 | 7.69222870  | 13.85801328 |
| N  | 1.39366074  | 6.51543691  | 13.85677894 |
| H  | 15.45734344 | 20.37905242 | 13.85409979 |
| N  | 20.65984265 | 5.34157637  | 13.85286865 |
| N  | 12.02047324 | 0.08772677  | 13.86005909 |
| N  | 20.65396213 | 19.19802991 | 13.85332999 |
| N  | 1.38973529  | 18.02485846 | 13.85412999 |
| C  | 0.62712564  | 19.14585224 | 13.85245005 |
| C  | 0.63299161  | 5.39316643  | 13.85356512 |
| H  | 1.17609841  | 4.44522455  | 13.85004768 |
| C  | 9.37767950  | 0.08845380  | 13.85675953 |
| H  | 1.16838560  | 20.09491545 | 13.84933192 |
| H  | 8.28643569  | 0.08882391  | 13.85392658 |

## 2.11 Molecule in Figure 7(a)

54

Energy =

|    |            |            |            |
|----|------------|------------|------------|
| C  | 2.3348862  | -4.5195257 | -1.6564914 |
| C  | 2.7465810  | 4.2818336  | -1.6564914 |
| H  | 2.4188238  | -5.6016578 | -1.6438545 |
| H  | 3.6417661  | 4.8955918  | -1.6438545 |
| C  | -5.0814671 | 0.2376921  | -1.6564914 |
| H  | -6.0605899 | 0.7060661  | -1.6438545 |
| C  | 0.9947912  | -2.6720142 | -1.6330123 |
| C  | 1.8166366  | 2.1975215  | -1.6330123 |
| C  | -2.8114278 | 0.4744927  | -1.6330123 |
| C  | 3.3116640  | -2.5168098 | -1.6914158 |
| H  | 4.1918032  | -1.8849901 | -1.6987510 |
| C  | 0.5237892  | 4.1263900  | -1.6914158 |
| H  | -0.4634523 | 4.5727031  | -1.6987510 |
| C  | -3.8354532 | -1.6095802 | -1.6914158 |
| H  | -3.7283509 | -2.6877131 | -1.6987510 |
| N  | 0.5853366  | 2.7912052  | -1.6646274 |
| N  | 1.5762794  | 4.9226621  | -1.7037642 |
| N  | 2.9154774  | 2.9686280  | -1.6122748 |
| N  | -2.7099230 | -0.8886862 | -1.6646274 |
| N  | -4.0286460 | 1.0405635  | -1.6122748 |
| N  | -5.0512901 | -1.0962331 | -1.7037642 |
| N  | 2.1245863  | -1.9025190 | -1.6646274 |
| N  | 1.1131686  | -4.0091915 | -1.6122748 |
| N  | 3.4750107  | -3.8264290 | -1.7037642 |
| Au | -1.1507081 | 1.5944124  | -1.6042618 |
| Au | -0.8054476 | -1.7937486 | -1.6042618 |
| Au | 1.9561557  | 0.1993363  | -1.6042618 |
| C  | 2.3348862  | 4.5195257  | 1.6564914  |
| C  | 2.7465810  | -4.2818336 | 1.6564914  |
| H  | 2.4188238  | 5.6016578  | 1.6438545  |
| H  | 3.6417661  | -4.8955918 | 1.6438545  |
| C  | -5.0814671 | -0.2376921 | 1.6564914  |
| H  | -6.0605899 | -0.7060661 | 1.6438545  |
| C  | 0.9947912  | 2.6720142  | 1.6330123  |
| C  | 1.8166366  | -2.1975215 | 1.6330123  |
| C  | -2.8114278 | -0.4744927 | 1.6330123  |
| C  | 3.3116640  | 2.5168098  | 1.6914158  |
| H  | 4.1918032  | 1.8849901  | 1.6987510  |
| C  | 0.5237892  | -4.1263900 | 1.6914158  |
| H  | -0.4634523 | -4.5727031 | 1.6987510  |
| C  | -3.8354532 | 1.6095802  | 1.6914158  |
| H  | -3.7283509 | 2.6877131  | 1.6987510  |
| N  | 0.5853366  | -2.7912052 | 1.6646274  |
| N  | 1.5762794  | -4.9226621 | 1.7037642  |
| N  | 2.9154774  | -2.9686280 | 1.6122748  |
| N  | -2.7099230 | 0.8886862  | 1.6646274  |
| N  | -4.0286460 | -1.0405635 | 1.6122748  |
| N  | -5.0512901 | 1.0962331  | 1.7037642  |
| N  | 2.1245863  | 1.9025190  | 1.6646274  |
| N  | 1.1131686  | 4.0091915  | 1.6122748  |
| N  | 3.4750107  | 3.8264290  | 1.7037642  |
| Au | -1.1507081 | -1.5944124 | 1.6042618  |
| Au | -0.8054476 | 1.7937486  | 1.6042618  |
| Au | 1.9561557  | -0.1993363 | 1.6042618  |

### 7(a) of C<sub>3h</sub> symmetry

54

|   |             |             |            |
|---|-------------|-------------|------------|
| C | -2.61555700 | -4.36408400 | 0.00000000 |
| C | 5.08718700  | -0.08309700 | 0.00000000 |
| H | -3.48924800 | -5.00845900 | 0.00000000 |
| H | 6.08207600  | -0.51754800 | 0.00000000 |
| C | -2.47162900 | 4.44718100  | 0.00000000 |
| H | -2.59282800 | 5.52600700  | 0.00000000 |
| C | -1.75491700 | -2.25043200 | 0.00000000 |

|    |             |             |            |
|----|-------------|-------------|------------|
| C  | 2.82639000  | -0.39458700 | 0.00000000 |
| C  | -1.07147200 | 2.64501900  | 0.00000000 |
| C  | -0.39918300 | -4.13747400 | 0.00000000 |
| H  | 0.60269700  | -4.55136600 | 0.00000000 |
| C  | 3.78275000  | 1.72303400  | 0.00000000 |
| H  | 3.64025000  | 2.79763400  | 0.00000000 |
| C  | -3.38356600 | 2.41444000  | 0.00000000 |
| H  | -4.24294700 | 1.75373200  | 0.00000000 |
| N  | 2.67929100  | 0.96592500  | 0.00000000 |
| N  | 5.01440600  | 1.25113200  | 0.00000000 |
| N  | 4.06217300  | -0.92094500 | 0.00000000 |
| N  | -2.17616100 | 1.83737200  | 0.00000000 |
| N  | -1.23352400 | 3.97841700  | 0.00000000 |
| N  | -3.59071500 | 3.71703700  | 0.00000000 |
| N  | -0.50313000 | -2.80329700 | 0.00000000 |
| N  | -2.82864800 | -3.05747200 | 0.00000000 |
| N  | -1.42369000 | -4.96816900 | 0.00000000 |
| Au | 0.75355000  | 1.81979000  | 0.00000000 |
| Au | -1.95276000 | -0.25730100 | 0.00000000 |
| Au | 1.19920900  | -1.56248900 | 0.00000000 |
| C  | -2.61555700 | -4.36408400 | 3.00000000 |
| C  | 5.08718700  | -0.08309700 | 3.00000000 |
| H  | -3.48924800 | -5.00845900 | 3.00000000 |
| H  | 6.08207600  | -0.51754800 | 3.00000000 |
| C  | -2.47162900 | 4.44718100  | 3.00000000 |
| H  | -2.59282800 | 5.52600700  | 3.00000000 |
| C  | -1.75491700 | -2.25043200 | 3.00000000 |
| C  | 2.82639000  | -0.39458700 | 3.00000000 |
| C  | -1.07147200 | 2.64501900  | 3.00000000 |
| C  | -0.39918300 | -4.13747400 | 3.00000000 |
| H  | 0.60269700  | -4.55136600 | 3.00000000 |
| C  | 3.78275000  | 1.72303400  | 3.00000000 |
| H  | 3.64025000  | 2.79763400  | 3.00000000 |
| C  | -3.38356600 | 2.41444000  | 3.00000000 |
| H  | -4.24294700 | 1.75373200  | 3.00000000 |
| N  | 2.67929100  | 0.96592500  | 3.00000000 |
| N  | 5.01440600  | 1.25113200  | 3.00000000 |
| N  | 4.06217300  | -0.92094500 | 3.00000000 |
| N  | -2.17616100 | 1.83737200  | 3.00000000 |
| N  | -1.23352400 | 3.97841700  | 3.00000000 |
| N  | -3.59071500 | 3.71703700  | 3.00000000 |
| N  | -0.50313000 | -2.80329700 | 3.00000000 |
| N  | -2.82864800 | -3.05747200 | 3.00000000 |
| N  | -1.42369000 | -4.96816900 | 3.00000000 |
| Au | 0.75355000  | 1.81979000  | 3.00000000 |
| Au | -1.95276000 | -0.25730100 | 3.00000000 |
| Au | 1.19920900  | -1.56248900 | 3.00000000 |

## 2.12 Molecule in Figure 7(b)

126

Energy =

|   |            |            |            |
|---|------------|------------|------------|
| C | -1.1815111 | 0.6821458  | -1.6312444 |
| C | -1.1792983 | -6.1528626 | -1.6678615 |
| C | 4.7126682  | -2.7208603 | -1.6276899 |
| C | -4.7126682 | -2.7208603 | -1.6276899 |
| C | 1.1815111  | 0.6821458  | -1.6312444 |
| C | 5.9181845  | 2.0551291  | -1.6678615 |
| C | 0.0000000  | -1.3642915 | -1.6312444 |
| C | -0.0000000 | 5.4417206  | -1.6276899 |
| C | -5.9181845 | 2.0551291  | -1.6678615 |
| C | -7.0055498 | 4.0446561  | -1.7014387 |
| H | -7.9463648 | 4.5878358  | -1.7146149 |
| C | -1.1155874 | 7.4801242  | -1.6083436 |
| H | -2.0626014 | 8.0045720  | -1.5882266 |
| C | 1.1155874  | 7.4801242  | -1.6083436 |
| H | 2.0626014  | 8.0045720  | -1.5882266 |
| C | 7.0055498  | 4.0446561  | -1.7014387 |
| H | 7.9463648  | 4.5878358  | -1.7146149 |

|    |            |            |            |
|----|------------|------------|------------|
| C  | 7.0357713  | -2.7739351 | -1.6083436 |
| H  | 7.9634634  | -2.2160208 | -1.5882266 |
| C  | 5.9201839  | -4.7061892 | -1.6083436 |
| H  | 5.9008620  | -5.7885512 | -1.5882266 |
| C  | 0.0000000  | -8.0893121 | -1.7014387 |
| H  | 0.0000000  | -9.1756717 | -1.7146149 |
| C  | -5.9201839 | -4.7061892 | -1.6083436 |
| H  | -5.9008620 | -5.7885512 | -1.5882266 |
| C  | -7.0357713 | -2.7739351 | -1.6083436 |
| H  | -7.9634634 | -2.2160208 | -1.5882266 |
| N  | -1.1618726 | -0.6708075 | -1.6308424 |
| N  | 0.0000000  | 1.3416149  | -1.6308424 |
| N  | 1.1618726  | -0.6708075 | -1.6308424 |
| Au | -2.9822103 | -1.7217799 | -1.5877946 |
| Au | -2.9192088 | 1.6854060  | -1.6069331 |
| Au | 0.0000000  | -3.3708120 | -1.6069331 |
| N  | 0.0000000  | -5.4730987 | -1.6675712 |
| N  | 1.1852677  | -7.4910234 | -1.6826074 |
| N  | -1.1852677 | -7.4910234 | -1.6826074 |
| N  | -7.0942736 | -4.0958808 | -1.6054554 |
| C  | 4.7388862  | 4.0977336  | -1.6678615 |
| C  | -4.7388862 | 4.0977336  | -1.6678615 |
| Au | 5.8983165  | 0.0542856  | -1.6022430 |
| Au | -5.8983165 | 0.0542856  | -1.6022430 |
| Au | 2.9961709  | 5.0809491  | -1.6022430 |
| C  | 1.1792983  | -6.1528626 | -1.6678615 |
| Au | 2.9021455  | -5.1352347 | -1.6022430 |
| Au | -2.9021455 | -5.1352347 | -1.6022430 |
| N  | -4.7421288 | -4.0787209 | -1.6238966 |
| N  | 4.7421288  | -4.0787209 | -1.6238966 |
| N  | 5.9033403  | -2.0674435 | -1.6238966 |
| N  | 7.0942736  | -4.0958808 | -1.6054554 |
| N  | 4.7398425  | 2.7365493  | -1.6675712 |
| N  | 5.8947827  | 4.7719836  | -1.6826074 |
| N  | 7.0800504  | 2.7190398  | -1.6826074 |
| N  | 1.1612116  | 6.1461644  | -1.6238966 |
| N  | 0.0000000  | 8.1917616  | -1.6054554 |
| N  | -4.7398425 | 2.7365493  | -1.6675712 |
| N  | -5.9033403 | -2.0674435 | -1.6238966 |
| N  | -1.1612116 | 6.1461644  | -1.6238966 |
| N  | -5.8947827 | 4.7719836  | -1.6826074 |
| N  | -7.0800504 | 2.7190398  | -1.6826074 |
| Au | 2.9822103  | -1.7217799 | -1.5877946 |
| Au | 2.9192088  | 1.6854060  | -1.6069331 |
| Au | -0.0000000 | 3.4435598  | -1.5877946 |
| Au | -2.9961709 | 5.0809491  | -1.6022430 |
| C  | -1.1815111 | -0.6821458 | 1.6312444  |
| C  | -1.1792983 | 6.1528626  | 1.6678615  |
| C  | 4.7126682  | 2.7208603  | 1.6276899  |
| C  | -4.7126682 | 2.7208603  | 1.6276899  |
| C  | 1.1815111  | -0.6821458 | 1.6312444  |
| C  | 5.9181845  | -2.0551291 | 1.6678615  |
| C  | 0.0000000  | 1.3642915  | 1.6312444  |
| C  | -0.0000000 | -5.4417206 | 1.6276899  |
| C  | -5.9181845 | -2.0551291 | 1.6678615  |
| C  | -7.0055498 | -4.0446561 | 1.7014387  |
| H  | -7.9463648 | -4.5878358 | 1.7146149  |
| C  | -1.1155874 | -7.4801242 | 1.6083436  |
| H  | -2.0626014 | -8.0045720 | 1.5882266  |
| C  | 1.1155874  | -7.4801242 | 1.6083436  |
| H  | 2.0626014  | -8.0045720 | 1.5882266  |
| C  | 7.0055498  | -4.0446561 | 1.7014387  |
| H  | 7.9463648  | -4.5878358 | 1.7146149  |
| C  | 7.0357713  | 2.7739351  | 1.6083436  |
| H  | 7.9634634  | 2.2160208  | 1.5882266  |
| C  | 5.9201839  | 4.7061892  | 1.6083436  |
| H  | 5.9008620  | 5.7885512  | 1.5882266  |
| C  | -0.0000000 | 8.0893121  | 1.7014387  |

|    |            |            |           |    |            |            |           |
|----|------------|------------|-----------|----|------------|------------|-----------|
| H  | 0.0000000  | 9.1756717  | 1.7146149 | C  | -4.7046490 | 5.9188510  | 0.0000000 |
| C  | -5.9201839 | 4.7061892  | 1.6083436 | H  | -5.7878320 | 5.8995400  | 0.0000000 |
| H  | -5.9008620 | 5.7885512  | 1.5882266 | C  | -2.7735510 | 7.0337710  | 0.0000000 |
| C  | -7.0357713 | 2.7739351  | 1.6083436 | H  | -2.2152360 | 7.9621800  | 0.0000000 |
| H  | -7.9634634 | 2.2160208  | 1.5882266 | N  | -0.6712230 | 1.1625930  | 0.0000000 |
| N  | -1.1618726 | 0.6708075  | 1.6308424 | N  | 1.3424470  | 0.0000000  | 0.0000000 |
| N  | 0.0000000  | -1.3416149 | 1.6308424 | N  | -0.6712230 | -1.1625930 | 0.0000000 |
| N  | 1.1618726  | 0.6708075  | 1.6308424 | Au | -1.7197710 | 2.9787300  | 0.0000000 |
| Au | -2.9822103 | 1.7217799  | 1.5877946 | Au | 1.6874450  | 2.9227400  | 0.0000000 |
| Au | -2.9192088 | -1.6854060 | 1.6069331 | Au | -3.3748890 | 0.0000000  | 0.0000000 |
| Au | 0.0000000  | 3.3708120  | 1.6069331 | N  | -5.4739310 | 0.0000000  | 0.0000000 |
| N  | 0.0000000  | 5.4730987  | 1.6675712 | N  | -7.4927750 | -1.1859420 | 0.0000000 |
| N  | 1.1852677  | 7.4910234  | 1.6826074 | N  | -7.4927750 | 1.1859420  | 0.0000000 |
| N  | -1.1852677 | 7.4910234  | 1.6826074 | N  | -4.0957720 | 7.0940850  | 0.0000000 |
| N  | -7.0942736 | 4.0958808  | 1.6054554 | C  | 4.0986150  | -4.7427980 | 0.0000000 |
| C  | 4.7388862  | -4.0977336 | 1.6678615 | C  | 4.0986150  | 4.7427980  | 0.0000000 |
| C  | -4.7388862 | -4.0977336 | 1.6678615 | Au | 0.0557180  | -5.8995580 | 0.0000000 |
| Au | 5.8983165  | -0.0542856 | 1.6022430 | Au | 0.0557180  | 5.8995580  | 0.0000000 |
| Au | -5.8983165 | -0.0542856 | 1.6022430 | Au | 5.0813080  | -2.9980320 | 0.0000000 |
| Au | 2.9961709  | -5.0809491 | 1.6022430 | C  | -6.1566910 | -1.1781060 | 0.0000000 |
| C  | 1.1792983  | 6.1528626  | 1.6678615 | Au | -5.1370260 | -2.9015260 | 0.0000000 |
| Au | 2.9021455  | 5.1352347  | 1.6022430 | Au | -5.1370260 | 2.9015260  | 0.0000000 |
| Au | -2.9021455 | 5.1352347  | 1.6022430 | N  | -4.0784740 | 4.7399170  | 0.0000000 |
| N  | -4.7421288 | 4.0787209  | 1.6238966 | N  | -4.0784740 | -4.7399170 | 0.0000000 |
| N  | 4.7421288  | 4.0787209  | 1.6238966 | N  | -2.0656520 | -5.9020210 | 0.0000000 |
| N  | 5.9033403  | 2.0674435  | 1.6238966 | N  | -4.0957720 | -7.0940850 | 0.0000000 |
| N  | 7.0942736  | 4.0958808  | 1.6054554 | N  | 2.7369650  | -4.7405630 | 0.0000000 |
| N  | 4.7398425  | -2.7365493 | 1.6675712 | N  | 4.7734430  | -5.8959630 | 0.0000000 |
| N  | 5.8947827  | -4.7719836 | 1.6826074 | N  | 2.7193320  | -7.0819040 | 0.0000000 |
| N  | 7.0800504  | -2.7190398 | 1.6826074 | N  | 6.1441260  | -1.1621040 | 0.0000000 |
| N  | 1.1612116  | -6.1461644 | 1.6238966 | N  | 8.1915430  | 0.0000000  | 0.0000000 |
| N  | -0.0000000 | -8.1917616 | 1.6054554 | N  | 2.7369650  | 4.7405630  | 0.0000000 |
| N  | -4.7398425 | -2.7365493 | 1.6675712 | N  | -2.0656520 | 5.9020210  | 0.0000000 |
| N  | -5.9033403 | 2.0674435  | 1.6238966 | N  | 6.1441260  | 1.1621040  | 0.0000000 |
| N  | -1.1612116 | -6.1461644 | 1.6238966 | N  | 4.7734430  | 5.8959630  | 0.0000000 |
| N  | -5.8947827 | -4.7719836 | 1.6826074 | N  | 2.7193320  | 7.0819040  | 0.0000000 |
| N  | -7.0800504 | -2.7190398 | 1.6826074 | Au | -1.7197710 | -2.9787300 | 0.0000000 |
| Au | 2.9822103  | 1.7217799  | 1.5877946 | Au | 1.6874450  | -2.9227400 | 0.0000000 |
| Au | 2.9192088  | -1.6854060 | 1.6069331 | Au | 3.4395410  | 0.0000000  | 0.0000000 |
| Au | 0.0000000  | -3.4435598 | 1.5877946 | Au | 5.0813080  | 2.9980320  | 0.0000000 |
| Au | -2.9961709 | -5.0809491 | 1.6022430 | C  | 0.6832740  | 1.1834660  | 3.0000000 |

### 7(b) of $D_{3h}$ symmetry

126

|   |            |            |           |   |            |            |           |
|---|------------|------------|-----------|---|------------|------------|-----------|
| C | 0.6832740  | 1.1834660  | 0.0000000 | C | -2.7190010 | -4.7094470 | 3.0000000 |
| C | -6.1566910 | 1.1781060  | 0.0000000 | C | -2.7190010 | 4.7094470  | 3.0000000 |
| C | -2.7190010 | -4.7094470 | 0.0000000 | C | 0.6832740  | -1.1834660 | 3.0000000 |
| C | -2.7190010 | 4.7094470  | 0.0000000 | C | 2.0580760  | -5.9209040 | 3.0000000 |
| C | 0.6832740  | -1.1834660 | 0.0000000 | C | 4.0452130  | 7.0065150  | 3.0000000 |
| C | 2.0580760  | -5.9209040 | 0.0000000 | H | 4.5885440  | 7.9475910  | 3.0000000 |
| C | -1.3665490 | 0.0000000  | 0.0000000 | C | 7.4782000  | 1.1149200  | 3.0000000 |
| C | 5.4380010  | 0.0000000  | 0.0000000 | H | 8.0030680  | 2.0626400  | 3.0000000 |
| C | 2.0580760  | 5.9209040  | 0.0000000 | C | 7.4782000  | -1.1149200 | 3.0000000 |
| C | 4.0452130  | 7.0065150  | 0.0000000 | H | 8.0030680  | -2.0626400 | 3.0000000 |
| H | 4.5885440  | 7.9475910  | 0.0000000 | C | 4.0452130  | -7.0065150 | 3.0000000 |
| C | 7.4782000  | 1.1149200  | 0.0000000 | H | 4.5885440  | -7.9475910 | 3.0000000 |
| H | 8.0030680  | 2.0626400  | 0.0000000 | C | -2.7735510 | -7.0337710 | 3.0000000 |
| C | 7.4782000  | -1.1149200 | 0.0000000 | H | -2.2152360 | -7.9621800 | 3.0000000 |
| H | 8.0030680  | -2.0626400 | 0.0000000 | C | -4.7046490 | -5.9188510 | 3.0000000 |
| C | 4.0452130  | -7.0065150 | 0.0000000 | H | -5.7878320 | -5.8995400 | 3.0000000 |
| H | 4.5885440  | -7.9475910 | 0.0000000 | C | -8.0904270 | 0.0000000  | 3.0000000 |
| C | -2.7735510 | -7.0337710 | 0.0000000 | H | -9.1770870 | 0.0000000  | 3.0000000 |
| H | -2.2152360 | -7.9621800 | 0.0000000 | C | -4.7046490 | 5.9188510  | 3.0000000 |
| C | -4.7046490 | -5.9188510 | 0.0000000 | C | -5.7878320 | 5.8995400  | 3.0000000 |
| H | -5.7878320 | -5.8995400 | 0.0000000 | C | -2.7735510 | 7.0337710  | 3.0000000 |
| C | -8.0904270 | 0.0000000  | 0.0000000 | H | -2.2152360 | 7.9621800  | 3.0000000 |
| H | -9.1770870 | 0.0000000  | 0.0000000 | N | -0.6712230 | 1.1625930  | 3.0000000 |



|    |             |             |            |
|----|-------------|-------------|------------|
| N  | 1.34244700  | 0.00000000  | 3.00000000 |
| N  | -0.67122300 | -1.16259300 | 3.00000000 |
| Au | -1.71977100 | 2.97873000  | 3.00000000 |
| Au | 1.68744500  | 2.92274000  | 3.00000000 |
| Au | -3.37488900 | 0.00000000  | 3.00000000 |
| N  | -5.47393100 | 0.00000000  | 3.00000000 |
| N  | -7.49277500 | -1.18594200 | 3.00000000 |
| N  | -7.49277500 | 1.18594200  | 3.00000000 |
| N  | -4.09577200 | 7.09408500  | 3.00000000 |
| C  | 4.09861500  | -4.74279800 | 3.00000000 |
| C  | 4.09861500  | 4.74279800  | 3.00000000 |
| Au | 0.05571800  | -5.89955800 | 3.00000000 |
| Au | 0.05571800  | 5.89955800  | 3.00000000 |
| Au | 5.08130800  | -2.99803200 | 3.00000000 |
| C  | -6.15669100 | -1.17810600 | 3.00000000 |
| Au | -5.13702600 | -2.90152600 | 3.00000000 |
| Au | -5.13702600 | 2.90152600  | 3.00000000 |
| N  | -4.07847400 | 4.73991700  | 3.00000000 |
| N  | -4.07847400 | -4.73991700 | 3.00000000 |
| N  | -2.06565200 | -5.90202100 | 3.00000000 |
| N  | -4.09577200 | -7.09408500 | 3.00000000 |
| N  | 2.73696500  | -4.74056300 | 3.00000000 |
| N  | 4.77344300  | -5.89596300 | 3.00000000 |
| N  | 2.71933200  | -7.08190400 | 3.00000000 |
| N  | 6.14412600  | -1.16210400 | 3.00000000 |
| N  | 8.19154300  | 0.00000000  | 3.00000000 |
| N  | 2.73696500  | 4.74056300  | 3.00000000 |
| N  | -2.06565200 | 5.90202100  | 3.00000000 |
| N  | 6.14412600  | 1.16210400  | 3.00000000 |
| N  | 4.77344300  | 5.89596300  | 3.00000000 |
| N  | 2.71933200  | 7.08190400  | 3.00000000 |
| Au | -1.71977100 | -2.97873000 | 3.00000000 |
| Au | 1.68744500  | -2.92274000 | 3.00000000 |
| Au | 3.43954100  | 0.00000000  | 3.00000000 |
| Au | 5.08130800  | 2.99803200  | 3.00000000 |

## 2.13 Molecule in Figure 8

180

|    |             |             |             |
|----|-------------|-------------|-------------|
| C  | 1.11598100  | 7.83643600  | -7.40456200 |
| N  | 1.16532500  | 7.62695400  | -6.08750400 |
| N  | -0.00045200 | 7.98264300  | -8.10207600 |
| C  | -0.00033500 | 7.57118100  | -5.38632700 |
| C  | -1.11681100 | 7.83582400  | -7.40455600 |
| N  | -1.16602100 | 7.62640600  | -6.08748200 |
| Au | -2.91535400 | 6.95714000  | -5.05817300 |
| Au | -6.95800900 | 2.91484300  | -5.05823100 |
| H  | -2.06224200 | 7.88293100  | -7.93162700 |
| H  | -7.88413800 | 2.06138600  | -7.93163500 |
| C  | -7.83643600 | 1.11598100  | -7.40456200 |
| N  | -7.62695400 | 1.16532500  | -6.08750400 |
| N  | -7.98264300 | -0.00045200 | -8.10207600 |
| C  | -7.57118100 | -0.00033500 | -5.38632700 |
| C  | -7.83582400 | -1.11681100 | -7.40455600 |
| N  | -7.62640600 | -1.16602100 | -6.08748200 |
| Au | -6.95714000 | -2.91535400 | -5.05817300 |
| Au | -2.91484300 | -6.95800900 | -5.05823100 |
| H  | -7.88293100 | -2.06224200 | -7.93162700 |
| H  | -2.06138600 | -7.88413800 | -7.93163500 |
| C  | -1.11598100 | -7.83643600 | -7.40456200 |
| N  | -1.16532500 | -7.62695400 | -6.08750400 |
| N  | 0.00045200  | -7.98264300 | -8.10207600 |
| C  | 0.00033500  | -7.57118100 | -5.38632700 |
| C  | 1.11681100  | -7.83582400 | -7.40455600 |
| N  | 1.16602100  | -7.62640600 | -6.08748200 |
| Au | 2.91535400  | -6.95714000 | -5.05817300 |
| Au | 6.95800900  | -2.91484300 | -5.05823100 |
| H  | 2.06224200  | -7.88293100 | -7.93162700 |

|    |             |             |             |
|----|-------------|-------------|-------------|
| H  | 7.88413800  | -2.06138600 | -7.93163500 |
| C  | 7.83643600  | -1.11598100 | -7.40456200 |
| N  | 7.62695400  | -1.16532500 | -6.08750400 |
| N  | 7.98264300  | 0.00045200  | -8.10207600 |
| C  | 7.57118100  | 0.00033500  | -5.38632700 |
| C  | 7.83582400  | 1.11681100  | -7.40455600 |
| N  | 7.62640600  | 1.16602100  | -6.08748200 |
| Au | 6.95714000  | 2.91535400  | -5.05817300 |
| Au | 2.91484300  | 6.95800900  | -5.05823100 |
| H  | 7.88293100  | 2.06224200  | -7.93162700 |
| H  | 2.06138600  | 7.88413800  | -7.93163500 |
| C  | -4.42337000 | 6.04880800  | -4.09259900 |
| N  | -4.44393400 | 6.08498700  | -2.72900800 |
| N  | -5.27250500 | 5.27183800  | -4.76605700 |
| C  | -5.30348200 | 5.30278600  | -2.04150100 |
| C  | -6.04967500 | 4.42285800  | -4.09263200 |
| N  | -6.08592600 | 4.44347500  | -2.72904300 |
| Au | -7.45767300 | -0.00029700 | -3.39688100 |
| Au | -6.91571600 | 2.83968000  | -1.66261800 |
| Au | -6.91473300 | -2.84010900 | -1.66257300 |
| C  | -6.04880800 | -4.42337000 | -4.09259900 |
| N  | -6.08498700 | -4.44393400 | -2.72900800 |
| N  | -5.27183800 | -5.27250500 | -4.76605700 |
| C  | -5.30278600 | -5.30348200 | -2.04150100 |
| C  | -4.42285800 | -6.04967500 | -4.09263200 |
| N  | -4.44347500 | -6.08592600 | -2.72904300 |
| Au | 0.00029700  | -7.45767300 | -3.39688100 |
| Au | -2.83968000 | -6.91571600 | -1.66261800 |
| Au | 2.84010900  | -6.91473300 | -1.66257300 |
| C  | 4.42337000  | -6.04880800 | -4.09259900 |
| N  | 4.44393400  | -6.08498700 | -2.72900800 |
| N  | 5.27250500  | -5.27183800 | -4.76605700 |
| C  | 5.30348200  | -5.30278600 | -2.04150100 |
| C  | 6.04967500  | -4.42285800 | -4.09263200 |
| N  | 6.08592600  | -4.44347500 | -2.72904300 |
| Au | 7.45767300  | 0.00029700  | -3.39688100 |
| Au | 6.91571600  | -2.83968000 | -1.66261800 |
| Au | 6.91473300  | 2.84010900  | -1.66257300 |
| C  | 6.04880800  | 4.42337000  | -4.09259900 |
| N  | 6.08498700  | 4.44393400  | -2.72900800 |
| N  | 5.27183800  | 5.27250500  | -4.76605700 |
| C  | 5.30278600  | 5.30348200  | -2.04150100 |
| C  | 4.42285800  | 6.04967500  | -4.09263200 |
| N  | 4.44347500  | 6.08592600  | -2.72904300 |
| Au | -0.00029700 | 7.45767300  | -3.39688100 |
| Au | 2.83968000  | 6.91571600  | -1.66261800 |
| Au | -2.84010900 | 6.91473300  | -1.66257300 |
| C  | 1.17982000  | 7.38496500  | -0.64912000 |
| N  | 1.16280800  | 7.41299000  | 0.70108600  |
| N  | -0.00027800 | 7.45089100  | -1.30837200 |
| C  | -0.00023600 | 7.45609300  | 1.39472800  |
| C  | -1.18032000 | 7.38434500  | -0.64909200 |
| N  | -1.16326500 | 7.41227700  | 0.70111700  |
| Au | -5.31119600 | 5.31051400  | -0.03015100 |
| Au | -2.90584200 | 6.90631100  | 1.75236200  |
| Au | -6.90744800 | 2.90555600  | 1.75232000  |
| C  | -7.38496500 | 1.17982000  | -0.64912000 |
| N  | -7.41299000 | 1.16280800  | 0.70108600  |
| N  | -7.45089100 | -0.00027800 | -1.30837200 |
| C  | -7.45609300 | -0.00023600 | 1.39472800  |
| C  | -7.38434500 | -1.18032000 | -0.64909200 |
| N  | -7.41227700 | -1.16326500 | 0.70111700  |
| Au | -5.31051400 | -5.31119600 | -0.03015100 |
| Au | -6.90631100 | -2.90584200 | 1.75236200  |
| Au | -2.90555600 | -6.90744800 | 1.75232000  |
| C  | -1.17982000 | -7.38496500 | -0.64912000 |
| N  | -1.16280800 | -7.41299000 | 0.70108600  |
| N  | 0.00027800  | -7.45089100 | -1.30837200 |

|    |             |             |             |
|----|-------------|-------------|-------------|
| C  | 0.00023600  | -7.45609300 | 1.39472800  |
| C  | 1.18032000  | -7.38434500 | -0.64909200 |
| N  | 1.16326500  | -7.41227700 | 0.70111700  |
| Au | 5.31119600  | -5.31051400 | -0.03015100 |
| Au | 2.90584200  | -6.90631100 | 1.75236200  |
| Au | 6.90744800  | -2.90555600 | 1.75232000  |
| C  | 7.38496500  | -1.17982000 | -0.64912000 |
| N  | 7.41299000  | -1.16280800 | 0.70108600  |
| N  | 7.45089100  | 0.00027800  | -1.30837200 |
| C  | 7.45609300  | 0.00023600  | 1.39472800  |
| C  | 7.38434500  | 1.18032000  | -0.64909200 |
| N  | 7.41227700  | 1.16326500  | 0.70111700  |
| Au | 5.31051400  | 5.31119600  | -0.03015100 |
| Au | 6.90631100  | 2.90584200  | 1.75236200  |
| Au | 2.90555600  | 6.90744800  | 1.75232000  |
| C  | -4.43941600 | 6.11201100  | 2.74939800  |
| N  | -4.49742400 | 6.15378200  | 4.10892900  |
| N  | -5.32142100 | 5.32076700  | 2.09317900  |
| C  | -5.38467900 | 5.38401200  | 4.72831000  |
| C  | -6.11303100 | 4.43906200  | 2.74937600  |
| N  | -6.15485000 | 4.49712900  | 4.10889400  |
| Au | -7.43795200 | -0.00020200 | 3.39480000  |
| Au | -7.00510600 | 2.84571500  | 5.17078600  |
| Au | -7.00393400 | -2.84596200 | 5.17082500  |
| C  | -6.11201100 | -4.43941600 | 2.74939800  |
| N  | -6.15378200 | -4.49742400 | 4.10892900  |
| N  | -5.32076700 | -5.32142100 | 2.09317900  |
| C  | -5.38401200 | -5.38467900 | 4.72831000  |
| C  | -4.43906200 | -6.11303100 | 2.74937600  |
| N  | -4.49712900 | -6.15485000 | 4.10889400  |
| Au | 0.00020200  | -7.43795200 | 3.39480000  |
| Au | -2.84571500 | -7.00510600 | 5.17078600  |
| Au | 2.84596200  | -7.00393400 | 5.17082500  |
| C  | 4.43941600  | -6.11201100 | 2.74939800  |
| N  | 4.49742400  | -6.15378200 | 4.10892900  |
| N  | 5.32142100  | -5.32076700 | 2.09317900  |
| C  | 5.38467900  | -5.38401200 | 4.72831000  |
| C  | 6.11303100  | -4.43906200 | 2.74937600  |
| N  | 6.15485000  | -4.49712900 | 4.10889400  |
| Au | 7.43795200  | 0.00020200  | 3.39480000  |
| Au | 7.00510600  | -2.84571500 | 5.17078600  |
| Au | 7.00393400  | 2.84596200  | 5.17082500  |
| C  | 6.11201100  | 4.43941600  | 2.74939800  |
| N  | 6.15378200  | 4.49742400  | 4.10892900  |
| N  | 5.32076700  | 5.32142100  | 2.09317900  |
| C  | 5.38401200  | 5.38467900  | 4.72831000  |
| C  | 4.43906200  | 6.11303100  | 2.74937600  |
| N  | 4.49712900  | 6.15485000  | 4.10889400  |
| Au | -0.00020200 | 7.43795200  | 3.39480000  |
| Au | 2.84571500  | 7.00510600  | 5.17078600  |
| Au | -2.84596200 | 7.00393400  | 5.17082500  |
| C  | 1.17962000  | 7.53522300  | 6.16126600  |
| N  | 1.18690800  | 7.79879900  | 7.46938500  |
| N  | -0.00019100 | 7.48329000  | 5.48132700  |
| C  | -0.00029200 | 7.96855400  | 8.04318000  |
| C  | -1.18000600 | 7.53453500  | 6.16129900  |
| N  | -1.18740200 | 7.79802700  | 7.46943800  |
| H  | -0.00036400 | 8.24918700  | 9.09283100  |
| H  | -5.44697900 | 5.44631800  | 5.80698300  |
| C  | -7.53522300 | 1.17962000  | 6.16126600  |
| N  | -7.79879900 | 1.18690800  | 7.46938500  |
| N  | -7.48329000 | -0.00019100 | 5.48132700  |
| C  | -7.96855400 | -0.00029200 | 8.04318000  |
| C  | -7.53453500 | -1.18000600 | 6.16129900  |
| N  | -7.79802700 | -1.18740200 | 7.46943800  |
| H  | -8.24918700 | -0.00036400 | 9.09283100  |
| H  | -5.44631800 | -5.44697900 | 5.80698300  |
| C  | -1.17962000 | -7.53522300 | 6.16126600  |

|   |             |             |            |
|---|-------------|-------------|------------|
| N | -1.18690800 | -7.79879900 | 7.46938500 |
| N | 0.00019100  | -7.48329000 | 5.48132700 |
| C | 0.00029200  | -7.96855400 | 8.04318000 |
| C | 1.18000600  | -7.53453500 | 6.16129900 |
| N | 1.18740200  | -7.79802700 | 7.46943800 |
| H | 0.00036400  | -8.24918700 | 9.09283100 |
| H | 5.44697900  | -5.44631800 | 5.80698300 |
| C | 7.53522300  | -1.17962000 | 6.16126600 |
| N | 7.79879900  | -1.18690800 | 7.46938500 |
| N | 7.48329000  | 0.00019100  | 5.48132700 |
| C | 7.96855400  | 0.00029200  | 8.04318000 |
| C | 7.53453500  | 1.18000600  | 6.16129900 |
| N | 7.79802700  | 1.18740200  | 7.46943800 |
| H | 8.24918700  | 0.00036400  | 9.09283100 |
| H | 5.44631800  | 5.44697900  | 5.80698300 |

## 2.14 Unit cell in Figure 9

108

cell parameters a= 7.15 \AA, b= 40 \AA and c=40 \AA

|    |            |             |             |
|----|------------|-------------|-------------|
| N  | 0.17424700 | 9.85925400  | 14.06563900 |
| C  | 0.87271800 | 10.51909100 | 13.11218900 |
| N  | 0.17324800 | 11.21882700 | 12.18844000 |
| Au | 1.33194100 | 12.59095200 | 10.87690700 |
| Au | 1.33403200 | 18.07775100 | 8.42437500  |
| N  | 0.17491100 | 19.96906800 | 8.27143800  |
| C  | 0.87403600 | 21.12394600 | 8.36951300  |
| N  | 0.17484600 | 22.27358500 | 8.51650600  |
| Au | 1.33522500 | 24.09455500 | 9.04870500  |
| Au | 1.33308700 | 28.96524400 | 12.57471600 |
| N  | 0.17336000 | 30.04092600 | 14.13765100 |
| C  | 0.87287300 | 30.53799600 | 15.18400600 |
| N  | 0.17408900 | 30.98906600 | 16.25196900 |
| Au | 1.33240900 | 31.43461600 | 18.09717400 |
| Au | 1.33327300 | 30.81407200 | 24.07556100 |
| N  | 0.17430700 | 29.99708200 | 25.78935100 |
| C  | 0.87278100 | 29.33724700 | 26.74280400 |
| N  | 0.17331300 | 28.63750800 | 27.66654800 |
| Au | 1.33200500 | 27.26538400 | 28.97808500 |
| Au | 1.33408800 | 21.77858600 | 31.43061800 |
| N  | 0.17496200 | 19.88726600 | 31.58355100 |
| C  | 0.87408100 | 18.73239200 | 31.48547900 |
| N  | 0.17488500 | 17.58274900 | 31.33848200 |
| Au | 1.33525500 | 15.76178300 | 30.80628800 |
| Au | 1.33308500 | 10.89109500 | 27.28027900 |
| N  | 0.17334900 | 9.81540700  | 25.71733700 |
| C  | 0.87287100 | 9.31834900  | 24.67101000 |
| N  | 0.17406400 | 8.86726700  | 23.60301900 |
| Au | 1.33237400 | 8.42172100  | 21.75781900 |
| Au | 1.33321400 | 9.04226300  | 15.77943300 |
| C  | 2.42601800 | 8.27372900  | 19.90984400 |
| N  | 3.81232300 | 8.27209000  | 19.88611500 |
| N  | 1.75926600 | 8.34691300  | 18.72943400 |
| C  | 4.51148700 | 8.36992200  | 18.73177100 |
| C  | 2.42606400 | 8.51966700  | 17.55940200 |
| N  | 3.81245000 | 8.51706700  | 17.58277700 |
| Au | 3.08648300 | 10.58326900 | 13.16134900 |
| Au | 4.96149000 | 9.04997800  | 15.75729600 |
| Au | 4.95974900 | 12.57204400 | 10.89253200 |
| C  | 2.42461400 | 14.11831600 | 9.82539200  |
| N  | 3.81069800 | 14.13856400 | 9.81508400  |
| N  | 1.75840600 | 15.17623700 | 9.29607400  |
| C  | 4.51088500 | 15.18433400 | 9.31816900  |
| C  | 2.42605900 | 16.27512700 | 8.86018000  |
| N  | 3.81211100 | 16.25195700 | 8.86743000  |
| Au | 3.08754600 | 21.11441100 | 8.45170700  |
| Au | 4.96403300 | 18.09868400 | 8.42032600  |
| Au | 4.96163000 | 24.07368600 | 9.03964300  |

|    |            |             |             |    |             |             |             |
|----|------------|-------------|-------------|----|-------------|-------------|-------------|
| C  | 2.42631900 | 25.76888000 | 9.84850200  | C  | -2.03109000 | -8.46511000 | 2.03109000  |
| N  | 3.81261700 | 25.79041600 | 9.85943500  | C  | 2.63593000  | -7.58628000 | 2.63593000  |
| N  | 1.75905800 | 26.75357700 | 10.50291400 | C  | 2.03109000  | -8.46511000 | -2.03109000 |
| C  | 4.51106600 | 26.74377400 | 10.51875200 | C  | -5.54905000 | -0.63883000 | 5.54905000  |
| C  | 2.42523900 | 27.68348400 | 11.23445000 | C  | -2.63593000 | 2.63593000  | 7.58628000  |
| N  | 3.81133000 | 27.66697600 | 11.21790800 | C  | -5.54905000 | -5.54905000 | 0.63883000  |
| Au | 3.08656300 | 30.46115600 | 15.21772100 | C  | -2.63593000 | -7.58628000 | -2.63593000 |
| Au | 4.96203400 | 28.97996200 | 12.59192100 | C  | 0.63883000  | -5.54905000 | -5.54905000 |
| Au | 4.96225500 | 31.43185500 | 18.07398100 | C  | -8.46511000 | -2.03109000 | 2.03109000  |
| C  | 2.42606100 | 31.58261300 | 19.94515600 | C  | -7.58628000 | 2.63593000  | 2.63593000  |
| N  | 3.81236500 | 31.58425600 | 19.96888900 | C  | -7.58628000 | -2.63593000 | -2.63593000 |
| N  | 1.75931400 | 31.50942500 | 21.12556100 | C  | -2.63593000 | -2.63593000 | -7.58628000 |
| C  | 4.51153500 | 31.48642700 | 21.12323700 | C  | 2.03109000  | -2.03109000 | -8.46511000 |
| C  | 2.42611700 | 31.33667500 | 22.29559700 | C  | -8.46511000 | 2.03109000  | -2.03109000 |
| N  | 3.81250200 | 31.33928100 | 22.27222700 | C  | -5.54905000 | 0.63883000  | -5.54905000 |
| Au | 3.08654600 | 29.27307400 | 26.69365100 | C  | -2.03109000 | 2.03109000  | -8.46511000 |
| Au | 4.96154800 | 30.80637200 | 24.09771300 | C  | -5.54905000 | 5.54905000  | -0.63883000 |
| Au | 4.95981400 | 27.28430600 | 28.96247500 | C  | -0.63883000 | 5.54905000  | -5.54905000 |
| C  | 2.42467700 | 25.73802600 | 30.02960700 | C  | 2.63593000  | 2.63593000  | -7.58628000 |
| N  | 3.81076000 | 25.71778400 | 30.03992000 | C  | 5.54905000  | -0.63883000 | -5.54905000 |
| N  | 1.75846800 | 24.68010200 | 30.55892200 | C  | 5.54905000  | -5.54905000 | -0.63883000 |
| C  | 4.51094700 | 24.67201700 | 30.53683800 | C  | -2.63593000 | 7.58628000  | 2.63593000  |
| C  | 2.42611900 | 23.58121600 | 30.99481800 | C  | -2.03109000 | 8.46511000  | -2.03109000 |
| N  | 3.81217100 | 23.60439100 | 30.98757400 | C  | 2.63593000  | 7.58628000  | -2.63593000 |
| Au | 3.08759100 | 18.74193200 | 31.40329200 | C  | 7.58628000  | 2.63593000  | -2.63593000 |
| Au | 4.96408800 | 21.75766500 | 31.43468100 | C  | 8.46511000  | -2.03109000 | -2.03109000 |
| Au | 4.96166100 | 15.78266500 | 30.81536700 | C  | 7.58628000  | -2.63593000 | 2.63593000  |
| C  | 2.42634600 | 14.08747200 | 30.00650300 | C  | 0.63883000  | 5.54905000  | 5.54905000  |
| N  | 3.81262800 | 14.06591300 | 29.99555400 | C  | 2.03109000  | 8.46511000  | 2.03109000  |
| N  | 1.75908000 | 13.10276300 | 29.35208500 | C  | 5.54905000  | 5.54905000  | 0.63883000  |
| C  | 4.51108100 | 13.11257900 | 29.33626000 | C  | 8.46511000  | 2.03109000  | 2.03109000  |
| C  | 2.42525000 | 12.17286500 | 28.62055500 | C  | 5.54905000  | 0.63883000  | 5.54905000  |
| N  | 3.81133500 | 12.18936800 | 28.63709300 | Au | -6.52316000 | 4.18737000  | 1.85351000  |
| Au | 3.08654400 | 9.39518700  | 24.63727900 | Au | -4.18737000 | 6.52316000  | 1.85351000  |
| Au | 4.96203100 | 10.87639000 | 27.26308700 | Au | -1.85351000 | 6.52316000  | 4.18737000  |
| Au | 4.96222100 | 8.42449500  | 21.78102800 | Au | -1.85351000 | 4.18737000  | 6.52316000  |
| C  | 6.05538800 | 9.84762700  | 14.08585400 | Au | -4.18737000 | 1.85351000  | 6.52316000  |
| N  | 5.38880800 | 10.50147300 | 13.10067100 | Au | -6.52316000 | 1.85351000  | 4.18737000  |
| C  | 6.05425400 | 11.23352700 | 12.17146600 | Au | 6.52316000  | -1.85351000 | 4.18737000  |
| Au | 6.72449000 | 15.21834900 | 9.39273000  | Au | 6.52316000  | -4.18737000 | 1.85351000  |
| C  | 6.05608700 | 19.94579800 | 8.27192500  | Au | 4.18737000  | -6.52316000 | 1.85351000  |
| N  | 5.38965300 | 21.12617400 | 8.34424300  | Au | 1.85351000  | -6.52316000 | 4.18737000  |
| C  | 6.05578700 | 22.29633000 | 8.51738200  | Au | 1.85351000  | -4.18737000 | 6.52316000  |
| Au | 6.72501500 | 26.69502600 | 10.58134700 | Au | 4.18737000  | -1.85351000 | 6.52316000  |
| C  | 6.05463500 | 30.03151100 | 14.11698800 | Au | -4.18737000 | -6.52316000 | -1.85351000 |
| N  | 5.38864900 | 30.56144600 | 15.17458800 | Au | -6.52316000 | -4.18737000 | -1.85351000 |
| C  | 6.05525700 | 30.99718500 | 16.27341000 | Au | -6.52316000 | -1.85351000 | -4.18737000 |
| Au | 6.72549300 | 31.40599800 | 21.11419300 | Au | -4.18737000 | -1.85351000 | -6.52316000 |
| C  | 6.05544900 | 30.00873000 | 25.76916000 | Au | -1.85351000 | -4.18737000 | -6.52316000 |
| N  | 5.38887200 | 29.35488000 | 26.75434000 | Au | -1.85351000 | -6.52316000 | -4.18737000 |
| C  | 6.05431900 | 28.62282900 | 27.68354800 | Au | 6.61185000  | 1.84346000  | 4.29652000  |
| Au | 6.72455200 | 24.63800800 | 30.46228500 | Au | 6.61185000  | 4.29652000  | 1.84346000  |
| C  | 6.05613600 | 19.91055900 | 31.58309000 | Au | 4.29652000  | 6.61185000  | 1.84346000  |
| N  | 5.38969800 | 18.73017700 | 31.51076900 | Au | 1.84346000  | 6.61185000  | 4.29652000  |
| C  | 6.05582700 | 17.56002600 | 31.33763300 | Au | 1.84346000  | 4.29652000  | 6.61185000  |
| Au | 6.72503100 | 13.16133000 | 29.27366800 | Au | 4.29652000  | 1.84346000  | 6.61185000  |
| C  | 6.05462400 | 9.82484500  | 25.73802600 | Au | 6.61185000  | -1.84346000 | -4.29652000 |
| N  | 5.38863100 | 9.29490600  | 24.68042100 | Au | 4.29652000  | -1.84346000 | -6.61185000 |
| C  | 6.05523200 | 8.85917100  | 23.58160500 | Au | 1.84346000  | -4.29652000 | -6.61185000 |
| Au | 6.72544400 | 8.45035700  | 18.74082200 | Au | 1.84346000  | -6.61185000 | -4.29652000 |
|    |            |             |             | Au | 4.29652000  | -6.61185000 | -1.84346000 |
|    |            |             |             | Au | 6.61185000  | -4.29652000 | -1.84346000 |
|    |            |             |             | Au | -1.84346000 | 4.29652000  | -6.61185000 |
|    |            |             |             | Au | -1.84346000 | 6.61185000  | -4.29652000 |
|    |            |             |             | Au | -4.29652000 | 6.61185000  | -1.84346000 |
|    |            |             |             | Au | -6.61185000 | 4.29652000  | -1.84346000 |
|    |            |             |             | Au | -6.61185000 | 1.84346000  | -4.29652000 |
|    |            |             |             | Au | -4.29652000 | 1.84346000  | -6.61185000 |

## 2.15 Molecule in Figure 10(a)

144

|   |             |             |            |
|---|-------------|-------------|------------|
| C | -2.03109000 | -2.03109000 | 8.46511000 |
| C | 2.03109000  | 2.03109000  | 8.46511000 |
| C | -0.63883000 | -5.54905000 | 5.54905000 |
| C | 2.63593000  | -2.63593000 | 7.58628000 |

|    |             |             |             |    |             |             |             |
|----|-------------|-------------|-------------|----|-------------|-------------|-------------|
| Au | -4.29652000 | -1.84346000 | 6.61185000  | N  | -2.06532000 | -8.50856000 | -2.06532000 |
| Au | -1.84346000 | -6.61185000 | 4.29652000  | N  | -5.54205000 | -0.59415000 | -5.54205000 |
| Au | -4.29652000 | -6.61185000 | 1.84346000  | N  | -2.06532000 | -2.06532000 | -8.50856000 |
| Au | -6.61185000 | -4.29652000 | 1.84346000  | N  | -0.59415000 | -5.54205000 | -5.54205000 |
| Au | -6.61185000 | -1.84346000 | 4.29652000  |    |             |             |             |
| Au | 6.52316000  | 4.18737000  | -1.85351000 |    |             |             |             |
| Au | 4.18737000  | 6.52316000  | -1.85351000 |    |             |             |             |
| Au | 1.85351000  | 6.52316000  | -4.18737000 |    |             |             |             |
| Au | 1.85351000  | 4.18737000  | -6.52316000 |    |             |             |             |
| Au | 4.18737000  | 1.85351000  | -6.52316000 |    |             |             |             |
| Au | 6.52316000  | 1.85351000  | -4.18737000 | C  | -1.60643500 | -1.60643500 | 8.03311200  |
| Au | 2.15510000  | -0.02433000 | -8.81422000 | C  | 1.60643500  | 1.60643500  | 8.03311200  |
| Au | -0.02433000 | 2.15510000  | -8.81422000 | C  | -0.11808900 | -5.28759900 | 5.28759900  |
| Au | -2.15510000 | 0.02433000  | -8.81422000 | C  | 2.99357400  | -2.99357400 | 8.10060700  |
| Au | 0.02433000  | -2.15510000 | -8.81422000 | C  | -1.60643500 | -8.03311200 | 1.60643500  |
| Au | 8.81422000  | -0.02433000 | -2.15510000 | C  | 2.99357400  | -8.10060700 | 2.99357400  |
| Au | 8.81422000  | 2.15510000  | 0.02433000  | C  | 1.60643500  | -8.03311200 | -1.60643500 |
| Au | 8.81422000  | 0.02433000  | 0.02433000  | C  | -5.28759900 | -0.11808900 | 5.28759900  |
| Au | 8.81422000  | -2.15510000 | -0.02433000 | C  | -2.99357400 | 2.99357400  | 8.10060700  |
| Au | -8.81422000 | -2.15510000 | 0.02433000  | C  | -5.28759900 | -5.28759900 | 0.11808900  |
| Au | -8.81422000 | -0.02433000 | 2.15510000  | C  | -2.99357400 | -8.10060700 | -2.99357400 |
| Au | -8.81422000 | 2.15510000  | -0.02433000 | C  | 0.11808900  | -5.28759900 | -5.28759900 |
| Au | -8.81422000 | 0.02433000  | -2.15510000 | C  | -8.03311200 | -1.60643500 | 1.60643500  |
| Au | -8.81422000 | 0.02433000  | -2.15510000 | C  | -8.10060700 | 2.99357400  | 2.99357400  |
| Au | -2.15510000 | -0.02433000 | 8.81422000  | C  | -8.10060700 | -2.99357400 | -2.99357400 |
| Au | -0.02433000 | -2.15510000 | 8.81422000  | C  | -2.99357400 | -2.99357400 | -8.10060700 |
| Au | 2.15510000  | 0.02433000  | 8.81422000  | C  | 1.60643500  | -1.60643500 | -8.03311200 |
| Au | 0.02433000  | 2.15510000  | 8.81422000  | C  | -8.03311200 | 1.60643500  | -1.60643500 |
| Au | -2.15510000 | 8.81422000  | -0.02433000 | C  | -5.28759900 | 0.11808900  | -5.28759900 |
| Au | -0.02433000 | 8.81422000  | -2.15510000 | C  | -1.60643500 | 1.60643500  | -8.03311200 |
| Au | 0.02433000  | 8.81422000  | 2.15510000  | C  | -5.28759900 | 5.28759900  | -0.11808900 |
| Au | 2.15510000  | 8.81422000  | 0.02433000  | C  | -0.11808900 | 5.28759900  | -5.28759900 |
| Au | -1.84346000 | -4.29652000 | 6.61185000  | C  | 2.99357400  | 2.99357400  | -8.10060700 |
| Au | -0.02433000 | -8.81422000 | 2.15510000  | C  | 5.28759900  | -0.11808900 | -5.28759900 |
| Au | -2.15510000 | -8.81422000 | 0.02433000  | C  | 5.28759900  | -5.28759900 | -0.11808900 |
| Au | 0.02433000  | -8.81422000 | -2.15510000 | C  | -2.99357400 | 8.10060700  | 2.99357400  |
| Au | 2.15510000  | -8.81422000 | -0.02433000 | C  | -1.60643500 | 8.03311200  | -1.60643500 |
| N  | 2.06532000  | -2.06532000 | 8.50856000  | C  | 2.99357400  | 8.10060700  | -2.99357400 |
| N  | -2.06532000 | 2.06532000  | 8.50856000  | C  | 8.10060700  | 2.99357400  | -2.99357400 |
| N  | 2.70988000  | 2.70988000  | 7.71619000  | C  | 8.03311200  | -1.60643500 | -1.60643500 |
| N  | -2.70988000 | -2.70988000 | 7.71619000  | C  | 8.10060700  | -2.99357400 | 2.99357400  |
| N  | 5.54205000  | -0.59415000 | 5.54205000  | C  | 0.11808900  | 5.28759900  | 5.28759900  |
| N  | -5.54205000 | 0.59415000  | 5.54205000  | C  | 1.60643500  | 8.03311200  | 1.60643500  |
| N  | 0.59415000  | -5.54205000 | 5.54205000  | C  | 5.28759900  | 5.28759900  | 0.11808900  |
| N  | -0.59415000 | 5.54205000  | 5.54205000  | C  | 8.03311200  | 1.60643500  | 1.60643500  |
| N  | -7.71619000 | -2.70988000 | 2.70988000  | C  | 5.28759900  | 0.11808900  | 5.28759900  |
| N  | -8.50856000 | 2.06532000  | 2.06532000  | Au | -6.64302700 | 4.27314900  | 2.30687600  |
| N  | -2.70988000 | -7.71619000 | 2.70988000  | Au | -4.27314900 | 6.64302700  | 2.30687600  |
| N  | -2.06532000 | 8.50856000  | 2.06532000  | Au | -2.30687600 | 6.64302700  | 4.27314900  |
| N  | 2.70988000  | 7.71619000  | 2.70988000  | Au | -2.30687600 | 4.27314900  | 6.64302700  |
| N  | 2.06532000  | -8.50856000 | 2.06532000  | Au | -4.27314900 | 2.30687600  | 6.64302700  |
| N  | 5.54205000  | -5.54205000 | 0.59415000  | Au | -6.64302700 | 2.30687600  | 4.27314900  |
| N  | 5.54205000  | 5.54205000  | -0.59415000 | Au | 6.64302700  | -2.30687600 | 4.27314900  |
| N  | 7.71619000  | 2.70988000  | 2.70988000  | Au | 6.64302700  | -4.27314900 | 2.30687600  |
| N  | 8.50856000  | -2.06532000 | 2.06532000  | Au | 4.27314900  | -6.64302700 | 2.30687600  |
| N  | 2.06532000  | 8.50856000  | -2.06532000 | Au | 2.30687600  | -6.64302700 | 4.27314900  |
| N  | 2.70988000  | -7.71619000 | -2.70988000 | Au | 2.30687600  | -4.27314900 | 6.64302700  |
| N  | 8.50856000  | 2.06532000  | -2.06532000 | Au | 4.27314900  | -2.30687600 | 6.64302700  |
| N  | 7.71619000  | -2.70988000 | -2.70988000 | Au | -4.27314900 | -6.64302700 | -2.30687600 |
| N  | 5.54205000  | 0.59415000  | -5.54205000 | Au | -6.64302700 | -4.27314900 | -2.30687600 |
| N  | 2.70988000  | -2.70988000 | -7.71619000 | Au | -6.64302700 | -2.30687600 | -4.27314900 |
| N  | 2.06532000  | 2.06532000  | -8.50856000 | Au | -4.27314900 | -2.30687600 | -6.64302700 |
| N  | -2.70988000 | 7.71619000  | -2.70988000 | Au | -2.30687600 | -4.27314900 | -6.64302700 |
| N  | -5.54205000 | 5.54205000  | 0.59415000  | Au | -2.30687600 | -6.64302700 | -4.27314900 |
| N  | -7.71619000 | 2.70988000  | -2.70988000 | Au | 6.27178200  | 1.17123700  | 3.85175300  |
| N  | 0.59415000  | 5.54205000  | -5.54205000 | Au | 6.27178200  | 3.85175300  | 1.17123700  |
| N  | -2.70988000 | 2.70988000  | -7.71619000 | Au | 3.85175300  | 6.27178200  | 1.17123700  |
| N  | -8.50856000 | -2.06532000 | -2.06532000 | Au | 1.17123700  | 6.27178200  | 3.85175300  |
| N  | -5.54205000 | -5.54205000 | -0.59415000 | Au | 1.17123700  | 3.85175300  | 6.27178200  |
|    |             |             |             | Au | 3.85175300  | 1.17123700  | 6.27178200  |

## 2.16 Molecule in Figure 10(b)

144

|    |             |             |             |    |             |             |             |
|----|-------------|-------------|-------------|----|-------------|-------------|-------------|
| Au | 6.27178200  | -1.17123700 | -3.85175300 | N  | 5.46673800  | 5.46673800  | -1.13722300 |
| Au | 3.85175300  | -1.17123700 | -6.27178200 | N  | 7.18675700  | 2.23041800  | 2.23041800  |
| Au | 1.17123700  | -3.85175300 | -6.27178200 | N  | 9.07810400  | -2.51382500 | 2.51382500  |
| Au | 1.17123700  | -6.27178200 | -3.85175300 | N  | 2.51382500  | 9.07810400  | -2.51382500 |
| Au | 3.85175300  | -6.27178200 | -1.17123700 | N  | 2.23041800  | -7.18675700 | -2.23041800 |
| Au | 6.27178200  | -3.85175300 | -1.17123700 | N  | 9.07810400  | 2.51382500  | -2.51382500 |
| Au | -1.17123700 | 3.85175300  | -6.27178200 | N  | 7.18675700  | -2.23041800 | -2.23041800 |
| Au | -1.17123700 | 6.27178200  | -3.85175300 | N  | 5.46673800  | 1.13722300  | -5.46673800 |
| Au | -3.85175300 | 6.27178200  | -1.17123700 | N  | 2.23041800  | -2.23041800 | -7.18675700 |
| Au | -6.27178200 | 3.85175300  | -1.17123700 | N  | 2.51382500  | 2.51382500  | -9.07810400 |
| Au | -6.27178200 | 1.17123700  | -3.85175300 | N  | -2.23041800 | 7.18675700  | -2.23041800 |
| Au | -3.85175300 | 1.17123700  | -6.27178200 | N  | -5.46673800 | 5.46673800  | 1.13722300  |
| Au | -3.85175300 | -1.17123700 | 6.27178200  | N  | -7.18675700 | 2.23041800  | -2.23041800 |
| Au | -1.17123700 | -6.27178200 | 3.85175300  | N  | 1.13722300  | 5.46673800  | -5.46673800 |
| Au | -3.85175300 | -6.27178200 | 1.17123700  | N  | -2.23041800 | 2.23041800  | -7.18675700 |
| Au | -6.27178200 | -3.85175300 | 1.17123700  | N  | -9.07810400 | -2.51382500 | -2.51382500 |
| Au | -6.27178200 | -1.17123700 | 3.85175300  | N  | -5.46673800 | -5.46673800 | -1.13722300 |
| Au | 6.64302700  | 4.27314900  | -2.30687600 | N  | -2.51382500 | -9.07810400 | -2.51382500 |
| Au | 4.27314900  | 6.64302700  | -2.30687600 | N  | -5.46673800 | -1.13722300 | -5.46673800 |
| Au | 2.30687600  | 6.64302700  | -4.27314900 | N  | -2.51382500 | -2.51382500 | -9.07810400 |
| Au | 2.30687600  | 4.27314900  | -6.64302700 | N  | -1.13722300 | -5.46673800 | -5.46673800 |
| Au | 4.27314900  | 2.30687600  | -6.64302700 |    |             |             |             |
| Au | 6.64302700  | 2.30687600  | -4.27314900 |    |             |             |             |
| Au | 2.19901500  | 0.24141800  | -8.63535900 |    |             |             |             |
| Au | 0.24141800  | 2.19901500  | -8.63535900 |    |             |             |             |
| Au | -2.19901500 | -0.24141800 | -8.63535900 |    |             |             |             |
| Au | -0.24141800 | -2.19901500 | -8.63535900 |    |             |             |             |
| Au | 8.63535900  | 0.24141800  | -2.19901500 | C  | 2.40524500  | 0.55931400  | 2.47309400  |
| Au | 8.63535900  | 2.19901500  | -0.24141800 | C  | 0.34971700  | 1.47588100  | 3.14860400  |
| Au | 8.63535900  | -0.24141800 | 2.19901500  | C  | 0.71563600  | -0.83919400 | 3.31630300  |
| Au | 8.63535900  | -2.19901500 | 0.24141800  | C  | 2.73331000  | -0.14993300 | -2.17275900 |
| Au | -8.63535900 | -2.19901500 | -0.24141800 | C  | 1.27825100  | -1.94276100 | -2.60883200 |
| Au | -8.63535900 | 0.24141800  | 2.19901500  | C  | 2.73629300  | -2.03386500 | -0.76834100 |
| Au | -8.63535900 | 2.19901500  | 0.24141800  | C  | -2.90415500 | -1.41033600 | 1.33843000  |
| Au | -8.63535900 | -0.24141800 | -2.19901500 | C  | -3.09819300 | -1.27157900 | -0.99924000 |
| Au | -2.19901500 | 0.24141800  | 8.63535900  | C  | -1.81777800 | -2.98487000 | -0.02620700 |
| Au | 0.24141800  | -2.19901500 | 8.63535900  | C  | -2.04333100 | 2.74613300  | -0.70550000 |
| Au | 2.19901500  | -0.24141800 | 8.63535900  | C  | -0.54482200 | 2.39946000  | -2.48198600 |
| Au | -0.24141800 | 2.19901500  | 8.63535900  | C  | 0.18979100  | 3.45176300  | -0.51358100 |
| Au | -2.19901500 | 8.63535900  | 0.24141800  | N  | 1.78663200  | -0.75344400 | -2.97236200 |
| Au | 0.24141800  | 8.63535900  | -2.19901500 | N  | 3.26373200  | -0.81342600 | -1.13183800 |
| Au | -0.24141800 | 8.63535900  | 2.19901500  | N  | 1.81460800  | -2.63130900 | -1.54205600 |
| Au | 2.19901500  | 8.63535900  | -0.24141800 | N  | -2.36413800 | -2.38777600 | -1.14189600 |
| Au | -1.17123700 | -3.85175300 | 6.27178200  | N  | -2.14892500 | -2.55536000 | 1.20299600  |
| Au | 0.24141800  | -8.63535900 | 2.19901500  | N  | -3.44277700 | -0.82199500 | 0.25731100  |
| Au | -2.19901500 | -8.63535900 | -0.24141800 | N  | -1.79420000 | 2.32390400  | -1.99369400 |
| Au | -0.24141800 | -8.63535900 | -2.19901500 | N  | 0.44248000  | 3.04474000  | -1.76879700 |
| Au | 2.19901500  | -8.63535900 | 0.24141800  | N  | -1.08827000 | 3.37792300  | -0.00280600 |
| N  | 2.51382500  | -2.51382500 | 9.07810400  | N  | 1.63779700  | 1.64119100  | 2.68675000  |
| N  | -2.51382500 | 2.51382500  | 9.07810400  | N  | 1.97325500  | -0.68849500 | 2.86824000  |
| N  | 2.23041800  | 2.23041800  | 7.18675700  | N  | -0.08022600 | 0.26406500  | 3.53813000  |
| N  | -2.23041800 | -2.23041800 | 7.18675700  | Au | 0.21325900  | 0.79928500  | -3.48278100 |
| N  | 5.46673800  | -1.13722300 | 5.46673800  | Au | -0.73418700 | -2.21937500 | -2.71093700 |
| N  | -5.46673800 | 1.13722300  | 5.46673800  | Au | -2.76139500 | 0.28900000  | -2.25939500 |
| N  | 1.13722300  | -5.46673800 | 5.46673800  | Au | 3.47297900  | 0.44242800  | 0.74592000  |
| N  | -1.13722300 | 5.46673800  | 5.46673800  | Au | 2.35270100  | 1.83822400  | -1.97476300 |
| N  | -7.18675700 | -2.23041800 | 2.23041800  | Au | 1.57017700  | 3.07864900  | 0.93285200  |
| N  | -9.07810400 | 2.51382500  | 2.51382500  | Au | -0.93759400 | 2.69884400  | 2.15662100  |
| N  | -2.23041800 | -7.18675700 | 2.23041800  | Au | -2.17728000 | -0.23602700 | 2.83158000  |
| N  | -2.51382500 | 9.07810400  | 2.51382500  | Au | -0.38866400 | -2.40151000 | 2.62598300  |
| N  | 2.23041800  | 7.18675700  | 2.23041800  | Au | -3.26687700 | 1.43987100  | 0.26067700  |
| N  | 2.51382500  | -9.07810400 | 2.51382500  | Au | 2.55532700  | -2.17131900 | 1.25285000  |
| N  | 5.46673800  | -5.46673800 | 1.13722300  | Au | 0.10162200  | -3.55810200 | -0.37857100 |

## 2.17 Molecule in Figure 11

36
